# Supplementary material
Source: PubMed Central journal article supplement (PMC3366046)
Supplement: NIHMS375187-supplement-1_si_001.pdf [file NIHMS375187-supplement-1_si_001.pdf]

Supporting Information for:

**A Theoretical Study of Cyclohexyne Addition to Carbonyl-C<sub>α</sub> Bonds:  
Allowed and Forbidden Electrocyclic and Non-Pericyclic Ring  
Openings of Strained Cyclobutenes**

C. Avery Sader and K. N. Houk\*

*Department of Chemistry and Biochemistry, University of California, Los Angeles,  
California 90095-1569*

*Contents:*

- S2 Coordinates and energies for **1-8a**.
- S8 Coordinates and energies for **2b-8b**.
- S14 Coordinates and energies for **5c-7c'**.
- S17 Coordinates and energies for **5d-8d**.
- S25 Coordinates and energies for **5e-8e**.
- S32 Coordinates and energies for **5f-6f'**.
- S37 Summary of computed Gibbs free energies
- S38 Plots of atomic charges
- S43 Table of atomic charges

**1**, B3LYP/6-31G(d), E = -233.3325677 hartrees

|   |           |           |           |
|---|-----------|-----------|-----------|
| C | 0.720981  | 1.054656  | 0.281800  |
| C | 1.590784  | -0.198668 | -0.116054 |
| C | 0.609664  | -1.302080 | -0.021454 |
| C | -0.610361 | -1.302055 | 0.021390  |
| C | -1.590840 | -0.197987 | 0.116121  |
| C | -0.720495 | 1.054736  | -0.281791 |
| H | 1.983616  | -0.104099 | -1.136653 |
| H | 2.454606  | -0.286254 | 0.553204  |
| H | 0.676966  | 1.099150  | 1.377518  |
| H | 1.235862  | 1.964373  | -0.054564 |
| H | -2.454913 | -0.285210 | -0.552859 |
| H | -1.983392 | -0.103481 | 1.136921  |
| H | -0.676319 | 1.098797  | -1.377534 |
| H | -1.234821 | 1.965113  | 0.053889  |

**2a**, B3LYP/6-31G(d), E = -269.9536876 hartrees

|   |           |           |           |
|---|-----------|-----------|-----------|
| C | 1.380452  | -0.735070 | -0.196311 |
| C | 1.403457  | 0.787226  | 0.117948  |
| C | -0.036316 | 1.182684  | -0.046752 |
| C | -0.919135 | 0.108806  | -0.007218 |
| C | -0.047099 | -1.181722 | 0.152049  |
| H | 2.170276  | -1.293782 | 0.333134  |
| H | 2.114744  | 1.311515  | -0.551929 |
| H | 1.822425  | 0.946792  | 1.142037  |
| H | -0.362837 | 2.221741  | -0.074726 |
| H | -0.424239 | -1.994229 | -0.486340 |
| H | -0.117469 | -1.545380 | 1.192390  |
| H | 1.553594  | -0.877686 | -1.272711 |
| O | -2.180581 | 0.032436  | -0.050019 |

**3a**, B3LYP/6-31G(d), E = -503.3590815 hartrees

|   |           |           |           |
|---|-----------|-----------|-----------|
| C | -2.912598 | 0.692926  | 0.517703  |
| C | -1.445983 | 1.136823  | 0.638143  |
| C | -0.490378 | -0.036250 | 0.425819  |
| C | -0.754723 | -1.225009 | -0.150897 |
| C | -2.198033 | -1.464404 | -0.581703 |
| C | -3.102118 | -0.213688 | -0.702841 |
| H | -1.243661 | 1.947662  | -0.084169 |
| H | -1.285924 | 1.600358  | 1.629695  |
| H | -3.193416 | 0.128150  | 1.421162  |

|   |           |           |           |
|---|-----------|-----------|-----------|
| H | -3.582042 | 1.566966  | 0.473344  |
| H | -2.224672 | -2.007619 | -1.543755 |
| H | -2.666608 | -2.166804 | 0.134791  |
| H | -2.820060 | 0.349238  | -1.606675 |
| H | -4.165418 | -0.487039 | -0.824068 |
| C | 2.934653  | -1.020717 | 0.078856  |
| C | 1.827090  | -0.949102 | 1.166800  |
| C | 0.976608  | 0.306021  | 0.859189  |
| C | 1.613608  | 0.912001  | -0.377634 |
| C | 2.335321  | -0.227751 | -1.093314 |
| H | 3.184088  | -2.055753 | -0.191268 |
| H | 2.250987  | -0.935396 | 2.179869  |
| H | 1.151640  | -1.806699 | 1.046905  |
| H | 0.966493  | 1.042395  | 1.675459  |
| H | 3.040368  | 0.127782  | -1.851939 |
| H | 1.546467  | -0.845010 | -1.551606 |
| H | 3.863621  | -0.539836 | 0.421535  |
| O | 1.559681  | 2.077066  | -0.751250 |

**4a (TS)**, B3LYP/6-31G(d), E = -503.3550423 hartrees

|   |           |           |           |
|---|-----------|-----------|-----------|
| C | 2.959308  | -0.591143 | 0.581909  |
| C | 1.590487  | -1.278837 | 0.478438  |
| C | 0.475050  | -0.270509 | 0.169884  |
| C | 0.604982  | 0.998712  | -0.291898 |
| C | 2.038494  | 1.473927  | -0.533608 |
| C | 3.146591  | 0.394156  | -0.576331 |
| H | 1.640299  | -2.069887 | -0.295331 |
| H | 1.384314  | -1.820066 | 1.420777  |
| H | 3.009594  | -0.032580 | 1.530161  |
| H | 3.771280  | -1.335808 | 0.611703  |
| H | 2.084669  | 2.055382  | -1.472369 |
| H | 2.300648  | 2.211650  | 0.249984  |
| H | 3.075713  | -0.160978 | -1.525204 |
| H | 4.157210  | 0.839234  | -0.549585 |
| C | -2.252707 | 1.145787  | 0.958360  |
| C | -1.698776 | -0.159880 | 1.581127  |
| C | -0.940158 | -0.841250 | 0.417001  |
| C | -1.812033 | -0.507426 | -0.791578 |
| C | -2.600314 | 0.778407  | -0.495670 |
| H | -1.430887 | 1.866569  | 0.922059  |
| H | -2.527872 | -0.799037 | 1.930908  |
| H | -1.044177 | 0.038475  | 2.438556  |
| H | -0.899021 | -1.933305 | 0.534288  |
| H | -3.669209 | 0.568487  | -0.653448 |

|   |           |           |           |
|---|-----------|-----------|-----------|
| H | -2.287541 | 1.549799  | -1.205867 |
| H | -3.103923 | 1.557601  | 1.519097  |
| O | -1.940829 | -1.173401 | -1.805191 |

Negative Nuclear Hessian Mode      1 Eigenvalue = -49.07 cm<sup>-1</sup>

**5a**, B3LYP/6-31G(d), E = -503.3659704 hartrees

|   |           |           |           |
|---|-----------|-----------|-----------|
| C | -2.665063 | 0.519469  | 0.828857  |
| C | -1.494982 | 1.462738  | 0.466118  |
| C | -0.349610 | 0.653148  | -0.069707 |
| C | -0.422717 | -0.623520 | -0.468915 |
| C | -1.659769 | -1.482287 | -0.426319 |
| C | -2.893845 | -0.568736 | -0.240463 |
| H | -1.815503 | 2.201052  | -0.287033 |
| H | -1.201715 | 2.053699  | 1.348408  |
| H | -2.439016 | 0.025790  | 1.786290  |
| H | -3.594994 | 1.088717  | 0.984355  |
| H | -1.776205 | -2.077657 | -1.346744 |
| H | -1.614928 | -2.220173 | 0.395023  |
| H | -3.111353 | -0.075129 | -1.199077 |
| H | -3.783040 | -1.165206 | 0.015189  |
| C | 2.063825  | -0.748880 | 1.290774  |
| C | 2.107464  | 0.709487  | 0.809346  |
| C | 1.163513  | 0.877106  | -0.454110 |
| C | 1.013727  | -0.788874 | -0.912183 |
| C | 1.934947  | -1.599010 | 0.000441  |
| H | 3.111686  | 0.962764  | 0.439606  |
| H | 1.865419  | 1.425920  | 1.609663  |
| H | 2.925707  | -1.692012 | -0.472371 |
| H | 1.598072  | -2.626491 | 0.227498  |
| H | 1.171319  | -0.951430 | -1.985873 |
| O | 1.470743  | 1.817547  | -1.284007 |
| H | 2.936892  | -1.042964 | 1.894636  |
| H | 1.176771  | -0.911103 | 1.919445  |

**6a (TS)**, B3LYP/6-31G(d), E = -503.286575 hartrees

|   |           |           |           |
|---|-----------|-----------|-----------|
| C | -0.348090 | -0.617430 | -0.535745 |
| C | 0.992980  | -0.857321 | -1.097204 |
| H | 1.210283  | -0.548503 | -2.114916 |
| C | -0.365633 | 0.655450  | -0.091650 |
| C | 2.003845  | -1.621930 | -0.295112 |
| H | 2.986087  | -1.576628 | -0.792192 |
| C | 1.045005  | 1.170710  | -0.187552 |

|   |           |           |           |
|---|-----------|-----------|-----------|
| C | 2.086610  | -0.892559 | 1.077013  |
| H | 1.200358  | -1.167009 | 1.667190  |
| C | 2.082464  | 0.624673  | 0.837109  |
| H | 1.968054  | 1.157485  | 1.800185  |
| H | 3.055451  | 0.941077  | 0.435113  |
| H | 1.807534  | -2.702907 | -0.111415 |
| H | 2.962944  | -1.203658 | 1.671456  |
| O | 1.299883  | 2.283979  | -0.724293 |
| C | -1.523316 | -1.560461 | -0.359295 |
| H | -1.203796 | -2.515678 | 0.089323  |
| H | -1.947734 | -1.832109 | -1.342207 |
| C | -1.594179 | 1.424140  | 0.329747  |
| H | -1.532274 | 1.705314  | 1.396261  |
| H | -1.657440 | 2.373956  | -0.221739 |
| C | -2.852960 | 0.564072  | 0.092484  |
| H | -3.716903 | 0.980306  | 0.632802  |
| H | -3.110722 | 0.587044  | -0.977130 |
| C | -2.618979 | -0.902121 | 0.506195  |
| H | -2.307607 | -0.923047 | 1.561573  |
| H | -3.559774 | -1.470821 | 0.444107  |

Negative Nuclear Hessian Mode      1 Eigenvalue = -340.00 cm<sup>-1</sup>

**6a'** (TS), B3LYP/6-31G(d), E = -503.3583425 hartrees

|   |           |           |           |
|---|-----------|-----------|-----------|
| C | -0.374317 | -0.687354 | -0.502014 |
| C | 0.924029  | -1.198571 | -0.993923 |
| H | 0.866743  | -1.855482 | -1.875567 |
| C | -0.287879 | 0.574169  | -0.039672 |
| C | 1.890598  | -1.715077 | 0.053314  |
| H | 2.851160  | -1.943072 | -0.442848 |
| C | 1.092686  | 1.145371  | -0.347703 |
| C | 2.144172  | -0.659398 | 1.153260  |
| H | 1.297236  | -0.664144 | 1.854249  |
| C | 2.267782  | 0.746734  | 0.556410  |
| H | 2.353877  | 1.491539  | 1.371633  |
| H | 3.178430  | 0.846914  | -0.049156 |
| H | 1.619166  | -2.666489 | 0.585641  |
| H | 3.036230  | -0.911029 | 1.750076  |
| O | 1.206950  | 2.123956  | -1.103598 |
| C | -1.701692 | -1.436344 | -0.499418 |
| H | -1.543145 | -2.479066 | -0.183824 |
| H | -2.083956 | -1.501304 | -1.533508 |
| C | -1.395457 | 1.372081  | 0.597445  |
| H | -1.301081 | 1.428558  | 1.699626  |
| H | -1.341823 | 2.412399  | 0.241630  |

|   |           |           |           |
|---|-----------|-----------|-----------|
| C | -2.762439 | 0.761643  | 0.236622  |
| H | -3.561920 | 1.208394  | 0.847815  |
| H | -2.992298 | 1.001617  | -0.811809 |
| C | -2.755575 | -0.767046 | 0.404275  |
| H | -2.525858 | -1.001696 | 1.455145  |
| H | -3.759822 | -1.176032 | 0.208113  |

Negative Nuclear Hessian Mode      1 Eigenvalue = -200.66 cm<sup>-1</sup>

**7a**, B3LYP/6-31G(d), E = -503.3834818 hartrees

|   |           |           |           |
|---|-----------|-----------|-----------|
| C | -0.208171 | -0.745495 | -0.529769 |
| C | 0.993045  | -1.162920 | -1.125091 |
| H | 1.423555  | -0.377135 | -1.754512 |
| C | -0.403967 | 0.640809  | -0.363247 |
| C | 2.071906  | -1.714716 | -0.215948 |
| H | 3.001490  | -1.918780 | -0.772169 |
| C | 0.736974  | 1.463706  | -0.066868 |
| C | 2.306789  | -0.592873 | 0.844008  |
| H | 1.570255  | -0.734317 | 1.647693  |
| C | 2.140561  | 0.856149  | 0.307921  |
| H | 2.500265  | 1.543720  | 1.088061  |
| H | 2.823563  | 1.010381  | -0.540913 |
| H | 1.808498  | -2.652382 | 0.299260  |
| H | 3.300970  | -0.679833 | 1.320419  |
| O | 0.662301  | 2.711624  | 0.046100  |
| C | -1.218841 | -1.718336 | 0.067021  |
| H | -0.718042 | -2.436849 | 0.737783  |
| H | -1.662513 | -2.333550 | -0.733230 |
| C | -1.778709 | 1.263046  | -0.222911 |
| H | -1.787371 | 1.935999  | 0.648877  |
| H | -2.036302 | 1.913405  | -1.077657 |
| C | -2.864475 | 0.178575  | -0.060645 |
| H | -3.780346 | 0.613550  | 0.367593  |
| H | -3.144884 | -0.225325 | -1.046245 |
| C | -2.350981 | -0.983244 | 0.804996  |
| H | -1.976369 | -0.579210 | 1.756917  |
| H | -3.165965 | -1.680870 | 1.052522  |

**7a'**, B3LYP/6-31G(d), E = -503.428128 hartrees

|   |           |           |           |
|---|-----------|-----------|-----------|
| C | -0.293994 | -0.900931 | -0.109863 |
| C | 0.704230  | -1.837026 | -0.039662 |
| H | 0.408265  | -2.870638 | -0.238777 |
| C | -0.259365 | 0.546003  | -0.002967 |

|   |           |           |           |
|---|-----------|-----------|-----------|
| C | 2.182783  | -1.704656 | 0.223654  |
| H | 2.743601  | -2.111324 | -0.640892 |
| C | 0.881155  | 1.365038  | -0.179210 |
| C | 2.712597  | -0.294164 | 0.495563  |
| H | 2.390745  | 0.045523  | 1.489184  |
| C | 2.226951  | 0.718630  | -0.556803 |
| H | 2.935065  | 1.548460  | -0.660231 |
| H | 2.160823  | 0.211146  | -1.532366 |
| H | 2.471741  | -2.362046 | 1.066882  |
| H | 3.813649  | -0.333121 | 0.523749  |
| O | 0.887144  | 2.622615  | -0.042512 |
| C | -1.673582 | -1.504742 | -0.432330 |
| H | -1.678609 | -2.575876 | -0.188851 |
| H | -1.841140 | -1.431617 | -1.520944 |
| C | -1.514293 | 1.302089  | 0.413426  |
| H | -1.584493 | 1.381666  | 1.518889  |
| H | -1.413973 | 2.335047  | 0.062711  |
| C | -2.829700 | 0.684808  | -0.072605 |
| H | -3.692824 | 1.198272  | 0.381299  |
| H | -2.922473 | 0.808396  | -1.163431 |
| C | -2.854101 | -0.809419 | 0.253949  |
| H | -2.781526 | -0.943638 | 1.344829  |
| H | -3.802095 | -1.274956 | -0.060873 |

**8a (TS)**, B3LYP/6-31G(d), E = -503.3579178 hartrees

|   |           |           |           |
|---|-----------|-----------|-----------|
| C | -0.301184 | -0.838199 | -0.287885 |
| C | 0.808879  | -1.766181 | -0.675605 |
| H | 1.173697  | -1.460814 | -1.676732 |
| C | -0.286871 | 0.524651  | -0.093805 |
| C | 1.991473  | -1.752848 | 0.286130  |
| H | 2.792557  | -2.357271 | -0.172411 |
| C | 0.934922  | 1.353139  | -0.157244 |
| C | 2.625745  | -0.370555 | 0.693663  |
| H | 2.245303  | -0.046129 | 1.673953  |
| C | 2.310987  | 0.725710  | -0.341216 |
| H | 3.028109  | 1.554247  | -0.285751 |
| H | 2.363590  | 0.274130  | -1.342697 |
| H | 1.748568  | -2.274615 | 1.231593  |
| H | 3.721551  | -0.448074 | 0.813035  |
| O | 0.864829  | 2.585169  | -0.022609 |
| C | -1.635854 | -1.574503 | -0.133363 |
| H | -1.415394 | -2.482108 | 0.443073  |
| H | -1.892430 | -1.956992 | -1.135095 |
| C | -1.541766 | 1.348903  | 0.196915  |

|   |           |           |           |
|---|-----------|-----------|-----------|
| H | -1.555835 | 1.650704  | 1.258284  |
| H | -1.475785 | 2.292863  | -0.356645 |
| C | -2.844957 | 0.618273  | -0.134008 |
| H | -3.709142 | 1.191640  | 0.234677  |
| H | -2.958687 | 0.542594  | -1.226511 |
| C | -2.815180 | -0.790296 | 0.460112  |
| H | -2.696555 | -0.710460 | 1.551965  |
| H | -3.765349 | -1.319632 | 0.287975  |

Negative Nuclear Hessian Mode      1 Eigenvalue = -707.79 cm<sup>-1</sup>

**2b**, B3LYP/6-31G(d), LANL2DZ, E = -298.1588989 hartrees

|   |           |           |           |
|---|-----------|-----------|-----------|
| C | 2.783973  | -0.730196 | -0.210350 |
| C | 2.801881  | 0.798710  | 0.076325  |
| C | 1.343045  | 1.178631  | -0.028202 |
| C | 0.503895  | 0.095763  | 0.030388  |
| C | 1.356449  | -1.184179 | 0.153550  |
| H | 3.574928  | -1.279937 | 0.335227  |
| H | 3.460427  | 1.329558  | -0.632465 |
| H | 3.230220  | 1.000569  | 1.079339  |
| H | 0.997138  | 2.213216  | -0.050806 |
| H | 0.975260  | -1.986214 | -0.497533 |
| H | 1.295033  | -1.569004 | 1.187468  |
| H | 2.953939  | -0.895458 | -1.292298 |
| O | -0.793981 | 0.027208  | 0.028711  |
| K | -3.308976 | 0.000907  | -0.025731 |

**3b**, B3LYP/6-31G(d), LANL2DZ, E = -531.559815 hartrees

|   |           |           |           |
|---|-----------|-----------|-----------|
| C | -3.166242 | -1.311583 | -0.686546 |
| C | -1.697982 | -1.588351 | -1.077165 |
| C | -0.917356 | -0.336728 | -0.598711 |
| C | -1.742504 | 0.155844  | 0.595403  |
| C | -3.047783 | -0.622184 | 0.683909  |
| H | -3.780690 | -2.219827 | -0.655272 |
| H | -1.569811 | -1.769010 | -2.151917 |
| H | -1.343883 | -2.483798 | -0.548033 |
| H | -1.065113 | 0.456505  | -1.353326 |
| H | -3.887897 | 0.022863  | 0.972782  |
| H | -2.917292 | -1.373122 | 1.483728  |
| H | -3.626355 | -0.622140 | -1.409818 |
| O | -1.426219 | 1.074685  | 1.346010  |
| K | 0.111373  | 2.944181  | -0.120388 |
| C | 2.386375  | -1.561191 | 1.092115  |



|   |          |           |           |
|---|----------|-----------|-----------|
| C | 0.961793 | -1.663204 | 0.532073  |
| C | 0.588874 | -0.461809 | -0.351997 |
| C | 1.456130 | 0.444185  | -0.873007 |
| C | 2.948843 | 0.223984  | -0.584135 |
| C | 3.354270 | -1.153612 | -0.021595 |
| H | 0.870541 | -2.607573 | -0.034263 |
| H | 0.242474 | -1.761541 | 1.364711  |
| H | 2.415081 | -0.798617 | 1.888101  |
| H | 2.685612 | -2.513940 | 1.554737  |
| H | 3.534795 | 0.425038  | -1.497602 |
| H | 3.284255 | 1.006358  | 0.125050  |
| H | 3.311445 | -1.908552 | -0.824400 |
| H | 4.393977 | -1.141674 | 0.342735  |

**4b (TS)**, B3LYP/6-31G(d), LANL2DZ, E = -531.5536695 hartrees

|   |           |           |           |
|---|-----------|-----------|-----------|
| C | 1.048925  | -2.892555 | -0.417735 |
| C | 0.747764  | -2.358590 | 1.003287  |
| C | 0.666594  | -0.819732 | 0.845099  |
| C | 1.767231  | -0.575154 | -0.170281 |
| C | 1.988566  | -1.830693 | -1.017073 |
| H | 0.123062  | -2.954125 | -1.004140 |
| H | 1.591261  | -2.603318 | 1.667070  |
| H | -0.148825 | -2.803657 | 1.446108  |
| H | 0.926274  | -0.295744 | 1.815504  |
| H | 3.049697  | -2.108231 | -0.918573 |
| H | 1.815595  | -1.614269 | -2.081327 |
| H | 1.495723  | -3.894539 | -0.403627 |
| O | 2.447750  | 0.440916  | -0.293482 |
| K | 1.554672  | 2.935882  | 0.175512  |
| C | -3.128001 | -0.717793 | -0.357441 |
| C | -1.880856 | -1.220986 | 0.383355  |
| C | -0.699970 | -0.240276 | 0.298888  |
| C | -0.780209 | 1.055829  | -0.087156 |
| C | -2.167225 | 1.588388  | -0.481445 |
| C | -3.383143 | 0.754187  | -0.037066 |
| H | -2.142163 | -1.405504 | 1.442944  |
| H | -1.617776 | -2.210149 | -0.018201 |
| H | -2.972768 | -0.823580 | -1.443930 |
| H | -3.996134 | -1.343961 | -0.100878 |
| H | -2.287882 | 2.620552  | -0.110769 |
| H | -2.196770 | 1.695411  | -1.583656 |
| H | -3.530186 | 0.865371  | 1.050382  |
| H | -4.307953 | 1.110913  | -0.518369 |

Negative Nuclear Hessian Mode      1 Eigenvalue = -24.27 cm<sup>-1</sup>

**5b**, B3LYP/6-31G(d), LANL2DZ, E = -531.5750267 hartrees

|   |           |           |           |
|---|-----------|-----------|-----------|
| C | -3.250824 | -1.339699 | -0.117915 |
| C | -2.663133 | -0.368704 | -1.171530 |
| C | -1.309411 | 0.081467  | -0.702678 |
| C | -0.613644 | -0.446708 | 0.313808  |
| C | -1.024566 | -1.635204 | 1.132387  |
| C | -2.202623 | -2.340903 | 0.416915  |
| H | -2.587063 | -0.871911 | -2.152192 |
| H | -3.346982 | 0.481815  | -1.327413 |
| H | -3.639617 | -0.750995 | 0.728090  |
| H | -4.106010 | -1.886251 | -0.541364 |
| H | -0.184747 | -2.336652 | 1.270108  |
| H | -1.326653 | -1.326985 | 2.149310  |
| H | -1.805361 | -2.924365 | -0.428964 |
| H | -2.686116 | -3.058312 | 1.095981  |
| C | -0.664934 | 2.600490  | 0.903968  |
| C | -0.692046 | 2.606398  | -0.643197 |
| C | -0.301822 | 1.172230  | -1.035345 |
| C | 0.578792  | 0.544570  | 0.195009  |
| C | 0.526516  | 1.693038  | 1.257824  |
| H | 0.064689  | 3.312249  | -1.021056 |
| H | -1.664146 | 2.932215  | -1.044250 |
| H | 0.188735  | 1.094928  | -2.026359 |
| H | 1.467621  | 2.256153  | 1.147380  |
| H | 0.489482  | 1.316257  | 2.291487  |
| O | 1.808134  | 0.024764  | -0.016873 |
| K | 4.029293  | -1.032379 | -0.311526 |
| H | -0.582054 | 3.609777  | 1.327902  |
| H | -1.597245 | 2.167321  | 1.289844  |

**6b (TS)**, B3LYP/6-31G(d), LANL2DZ, E = -531.5480663 hartrees

|   |           |           |           |
|---|-----------|-----------|-----------|
| C | -3.317224 | -1.287285 | 0.285508  |
| C | -3.006860 | -0.037096 | -0.567270 |
| C | -1.522378 | 0.249237  | -0.526215 |
| C | -0.628844 | -0.556788 | 0.115031  |
| C | -0.869322 | -2.002149 | 0.482765  |
| C | -2.290577 | -2.408824 | 0.027983  |
| H | -3.338689 | -0.210822 | -1.606276 |
| H | -3.594213 | 0.829189  | -0.214667 |
| H | -3.290945 | -1.018400 | 1.353779  |
| H | -4.334611 | -1.648497 | 0.075419  |

|   |           |           |           |
|---|-----------|-----------|-----------|
| H | -0.122357 | -2.678406 | 0.031218  |
| H | -0.773306 | -2.145315 | 1.574813  |
| H | -2.277351 | -2.630861 | -1.051258 |
| H | -2.599517 | -3.333864 | 0.536298  |
| C | 0.361621  | 2.866306  | 0.498448  |
| C | -0.821427 | 2.770832  | -0.510285 |
| C | -0.758010 | 1.371550  | -1.057425 |
| C | 0.568447  | 0.286839  | 0.349949  |
| C | 0.413357  | 1.532112  | 1.271547  |
| H | 0.281312  | 3.743500  | 1.179102  |
| H | -0.736315 | 3.571847  | -1.265338 |
| H | -1.768702 | 2.934461  | 0.030263  |
| H | 0.006640  | 1.165256  | -1.815789 |
| H | 1.265003  | 1.531377  | 1.971451  |
| H | -0.504737 | 1.440203  | 1.870943  |
| H | 1.308455  | 2.981797  | -0.071248 |
| O | 1.771828  | -0.145523 | 0.156733  |
| K | 4.080632  | -1.056615 | -0.319621 |

Negative Nuclear Hessian Mode      1 Eigenvalue = -326.20 cm<sup>-1</sup>

**6b' (TS)**, B3LYP/6-31G(d), LANL2DZ, E = -531.5482811 hartrees

|   |           |           |           |
|---|-----------|-----------|-----------|
| C | -3.353202 | 0.069304  | -0.668162 |
| C | -2.095952 | 0.135912  | -1.561091 |
| C | -0.824934 | 0.146739  | -0.735243 |
| C | -0.811606 | -0.187005 | 0.562689  |
| C | -2.006033 | -0.564485 | 1.401763  |
| C | -3.188370 | -0.937447 | 0.483955  |
| H | -2.080205 | -0.722407 | -2.257374 |
| H | -2.133600 | 1.031763  | -2.202497 |
| H | -3.539904 | 1.067395  | -0.240614 |
| H | -4.238452 | -0.185481 | -1.269635 |
| H | -1.755539 | -1.412083 | 2.060927  |
| H | -2.296537 | 0.261579  | 2.076388  |
| H | -3.010070 | -1.939099 | 0.061212  |
| H | -4.117503 | -1.000703 | 1.068841  |
| C | 1.702238  | 2.157296  | 0.419611  |
| C | 0.861613  | 2.059239  | -0.872453 |
| C | 0.536288  | 0.593630  | -1.176596 |
| C | 0.618391  | -0.071702 | 1.071055  |
| C | 1.065103  | 1.321539  | 1.547375  |
| H | 1.846661  | 3.199554  | 0.748258  |
| H | 1.430129  | 2.527728  | -1.692963 |
| H | -0.047752 | 2.679222  | -0.738074 |
| H | 0.777493  | 0.322763  | -2.227278 |

|   |          |           |           |
|---|----------|-----------|-----------|
| H | 1.775784 | 1.195960  | 2.377575  |
| H | 0.181027 | 1.855442  | 1.935619  |
| H | 2.702641 | 1.745662  | 0.211858  |
| O | 1.255764 | -1.099652 | 1.449078  |
| K | 2.602026 | -1.587801 | -0.754856 |

Negative Nuclear Hessian Mode      1 Eigenvalue = -295.79 cm<sup>-1</sup>

**7b**, B3LYP/6-31G(d), LANL2DZ, E = -531.561508 hartrees

|   |           |           |           |
|---|-----------|-----------|-----------|
| C | 1.390289  | 0.578624  | -0.517313 |
| C | 2.039046  | -0.458144 | -1.159887 |
| H | 1.366027  | -1.075599 | -1.767212 |
| C | 0.000173  | 0.327576  | -0.259532 |
| C | 3.044973  | -1.329087 | -0.460389 |
| H | 3.589178  | -0.783376 | 0.325063  |
| C | -0.272174 | -0.957083 | 0.270590  |
| C | 2.118076  | -2.413779 | 0.172085  |
| H | 1.771512  | -3.081814 | -0.643619 |
| C | 0.874544  | -1.840460 | 0.912680  |
| H | 0.336989  | -2.694060 | 1.349168  |
| H | 1.247662  | -1.248875 | 1.767408  |
| H | 3.794967  | -1.819464 | -1.104044 |
| H | 2.685411  | -3.055082 | 0.884773  |
| O | -1.462272 | -1.368284 | 0.528285  |
| C | -1.006044 | 1.458073  | -0.167018 |
| H | -1.715703 | 1.497840  | -1.018466 |
| H | -1.631630 | 1.329539  | 0.736120  |
| C | 2.047093  | 1.800823  | 0.109070  |
| H | 2.561085  | 2.389070  | -0.669160 |
| H | 2.834964  | 1.511123  | 0.826521  |
| C | -0.265274 | 2.814146  | -0.081534 |
| H | 0.037180  | 3.137062  | -1.090800 |
| H | -0.942421 | 3.589424  | 0.305968  |
| C | 0.994789  | 2.697456  | 0.794283  |
| H | 1.420913  | 3.691022  | 0.995598  |
| H | 0.713134  | 2.269614  | 1.769612  |
| K | -3.798107 | -0.567317 | -0.240601 |

**7b'**, B3LYP/6-31G(d), LANL2DZ, E = -531.6138037 hartrees

|   |           |           |           |
|---|-----------|-----------|-----------|
| C | -0.473471 | -0.278215 | 0.016767  |
| C | 0.625919  | 0.574161  | 0.157115  |
| C | 0.597753  | 2.091579  | 0.419249  |
| C | -1.898847 | 0.090324  | -0.040927 |

|   |           |           |           |
|---|-----------|-----------|-----------|
| C | -0.701198 | 2.902688  | 0.470195  |
| C | -2.429444 | 1.290753  | -0.387290 |
| C | -1.651255 | 2.543053  | -0.687662 |
| H | 1.241213  | 2.518988  | -0.368034 |
| H | -1.230939 | 2.738725  | 1.429380  |
| H | 1.160238  | 2.247911  | 1.355196  |
| H | -0.431121 | 3.978960  | 0.436195  |
| H | -3.515834 | 1.393854  | -0.346755 |
| H | -2.350960 | 3.369424  | -0.877644 |
| H | -1.048390 | 2.429373  | -1.608527 |
| O | 1.849553  | 0.135211  | 0.106389  |
| C | -0.124724 | -1.749655 | -0.236623 |
| C | -2.903894 | -0.996799 | 0.353639  |
| C | -1.149611 | -2.767855 | 0.280254  |
| H | 0.000616  | -1.928484 | -1.323820 |
| H | 0.857258  | -1.957727 | 0.203714  |
| C | -2.559607 | -2.392852 | -0.177254 |
| H | -3.911071 | -0.699138 | 0.030829  |
| H | -2.936265 | -1.063161 | 1.456185  |
| H | -0.879270 | -3.778477 | -0.062734 |
| H | -1.129366 | -2.789539 | 1.382555  |
| H | -3.300689 | -3.125443 | 0.176809  |
| H | -2.604629 | -2.396612 | -1.278890 |
| K | 4.278582  | -0.519128 | -0.129492 |

**8b (TS)**, B3LYP/6-31G(d), LANL2DZ, E = -531.5362916 hartrees

|   |           |           |           |
|---|-----------|-----------|-----------|
| C | 1.768817  | 0.470085  | -0.265289 |
| C | 1.794981  | 1.930620  | -0.624138 |
| H | 1.320880  | 2.023507  | -1.630409 |
| C | 0.688345  | -0.378829 | -0.103437 |
| C | 0.985354  | 2.821277  | 0.333843  |
| H | 0.991337  | 3.838516  | -0.092969 |
| C | -0.706046 | 0.062255  | -0.190325 |
| C | -0.504197 | 2.453282  | 0.646962  |
| H | -0.587745 | 1.958349  | 1.636144  |
| C | -1.090048 | 1.509585  | -0.423244 |
| H | -2.189200 | 1.549139  | -0.427718 |
| H | -0.727870 | 1.829806  | -1.411927 |
| H | 1.505071  | 2.919317  | 1.304197  |
| H | -1.138059 | 3.364115  | 0.703661  |
| O | -1.634028 | -0.768197 | -0.029071 |
| C | 3.170757  | -0.115395 | -0.101907 |
| H | 3.742012  | 0.610354  | 0.495274  |
| H | 3.639791  | -0.063347 | -1.101617 |

|   |           |           |           |
|---|-----------|-----------|-----------|
| C | 0.835426  | -1.878466 | 0.168040  |
| H | 0.593934  | -2.091529 | 1.224460  |
| H | 0.075204  | -2.418159 | -0.412201 |
| C | 2.226792  | -2.430586 | -0.151824 |
| H | 2.312692  | -3.465774 | 0.210120  |
| H | 2.370943  | -2.461186 | -1.244068 |
| C | 3.293693  | -1.532039 | 0.471117  |
| H | 3.147345  | -1.505241 | 1.563110  |
| H | 4.305262  | -1.928242 | 0.297871  |
| K | -4.266980 | -0.814988 | 0.029466  |

Negative Nuclear Hessian Mode      1 Eigenvalue = -537.34 cm<sup>-1</sup>

**5c**, B3LYP/6-31G(d), E = -503.9767088 hartrees

|   |           |           |           |
|---|-----------|-----------|-----------|
| C | -2.839198 | 0.838231  | 0.402702  |
| C | -1.747451 | 1.519757  | -0.458781 |
| C | -0.533905 | 0.646079  | -0.449953 |
| C | -0.477839 | -0.614667 | -0.002293 |
| C | -1.620041 | -1.429057 | 0.512782  |
| C | -2.930311 | -0.684331 | 0.157506  |
| H | -2.105107 | 1.666655  | -1.490069 |
| H | -1.526924 | 2.525768  | -0.073686 |
| H | -2.611236 | 1.013745  | 1.463384  |
| H | -3.813673 | 1.303647  | 0.210664  |
| H | -1.620823 | -2.437336 | 0.077944  |
| H | -1.538857 | -1.569548 | 1.602546  |
| H | -3.157009 | -0.859358 | -0.903162 |
| H | -3.767225 | -1.101445 | 0.730732  |
| C | 2.848584  | 0.595534  | 0.709263  |
| C | 1.889753  | 1.612527  | 0.046222  |
| C | 0.947175  | 0.735937  | -0.807196 |
| C | 1.021088  | -0.744682 | -0.217886 |
| C | 1.965561  | -0.634581 | 1.009076  |
| H | 3.354004  | 0.992585  | 1.597074  |
| H | 2.426851  | 2.366325  | -0.540019 |
| H | 1.323185  | 2.148072  | 0.819091  |
| H | 1.165656  | 0.782166  | -1.881106 |
| H | 2.537209  | -1.557975 | 1.156538  |
| H | 1.385613  | -0.464153 | 1.924097  |
| H | 3.636554  | 0.318345  | -0.006603 |
| O | 1.357223  | -1.801533 | -1.103761 |
| H | 2.313511  | -1.759716 | -1.266000 |

**6c (TS)**, B3LYP/6-31G(d), E = -503.929501 hartrees

|   |           |           |           |
|---|-----------|-----------|-----------|
| C | 2.623917  | -0.896048 | 0.669199  |
| C | 1.481120  | -1.676826 | -0.016013 |
| C | 0.396094  | -0.713757 | -0.428278 |
| C | 0.484771  | 0.648998  | -0.190078 |
| C | 1.778298  | 1.410822  | -0.050283 |
| C | 2.950573  | 0.402045  | -0.094774 |
| H | 1.873797  | -2.201383 | -0.900136 |
| H | 1.094037  | -2.466107 | 0.646919  |
| H | 2.329385  | -0.641965 | 1.697502  |
| H | 3.516893  | -1.528649 | 0.743963  |
| H | 1.900006  | 2.165554  | -0.839850 |
| H | 1.793700  | 1.966080  | 0.899904  |
| H | 3.173099  | 0.147895  | -1.140739 |
| H | 3.855706  | 0.867632  | 0.313612  |
| C | -2.831215 | -0.581940 | 0.389324  |
| C | -1.995099 | -1.713777 | -0.289919 |
| C | -0.857279 | 1.091139  | -0.012256 |
| C | -1.848309 | 0.453693  | 0.982377  |
| H | -3.513876 | -0.973725 | 1.157928  |
| H | -2.637284 | -2.299551 | -0.961397 |
| H | -1.595697 | -2.388129 | 0.478319  |
| H | -2.415381 | 1.258643  | 1.479182  |
| H | -1.263589 | -0.037222 | 1.769365  |
| H | -3.451858 | -0.094644 | -0.375385 |
| O | -1.143250 | 2.384453  | -0.388049 |
| H | -1.983601 | 2.663433  | 0.009144  |
| C | -0.904153 | -0.948067 | -0.965428 |
| H | -1.201650 | -0.371192 | -1.837163 |

Negative Nuclear Hessian Mode      1 Eigenvalue = -257.87 cm<sup>-1</sup>

**6c'** (TS), B3LYP/6-31G(d), E = -503.8983781 hartrees

|   |          |           |           |
|---|----------|-----------|-----------|
| C | 2.898580 | 0.537290  | -0.268719 |
| C | 2.005504 | 1.104899  | 0.858301  |
| C | 0.573967 | 0.699636  | 0.578591  |
| C | 0.273241 | -0.566104 | 0.077035  |
| C | 1.179810 | -1.257290 | -0.925357 |
| C | 2.641337 | -0.960684 | -0.521567 |
| H | 2.339411 | 0.694623  | 1.823123  |
| H | 2.112040 | 2.195224  | 0.914863  |
| H | 2.700995 | 1.096817  | -1.194440 |
| H | 3.957350 | 0.695954  | -0.026184 |
| H | 1.020294 | -2.343116 | -0.940142 |
| H | 1.017912 | -0.904587 | -1.958649 |

|   |           |           |           |
|---|-----------|-----------|-----------|
| H | 2.874379  | -1.521822 | 0.393776  |
| H | 3.321289  | -1.327795 | -1.301312 |
| C | -2.726770 | 0.641836  | -0.617775 |
| C | -1.536750 | 1.623257  | -0.627271 |
| C | -1.099121 | -0.879912 | 0.385321  |
| C | -2.190942 | -0.815595 | -0.645492 |
| H | -3.395711 | 0.815522  | -1.472671 |
| H | -1.937655 | 2.644598  | -0.671858 |
| H | -0.991573 | 1.463482  | -1.571648 |
| H | -3.000753 | -1.543639 | -0.489409 |
| H | -1.750081 | -1.003458 | -1.634645 |
| H | -3.319405 | 0.793582  | 0.295817  |
| O | -1.366208 | -1.593884 | 1.504302  |
| H | -2.322867 | -1.570884 | 1.688313  |
| C | -0.545883 | 1.556865  | 0.533477  |
| H | -0.533796 | 2.461384  | 1.151389  |

Negative Nuclear Hessian Mode      1 Eigenvalue = -346.44 cm<sup>-1</sup>

7c, B3LYP/6-31G(d), E = -503.9404706 hartrees

|   |           |           |           |
|---|-----------|-----------|-----------|
| C | 0.199116  | -0.848806 | -0.455547 |
| C | -1.005595 | -1.140481 | -1.017531 |
| H | -1.324045 | -0.429917 | -1.783405 |
| C | 0.498974  | 0.579400  | -0.452887 |
| C | -2.175194 | -1.651958 | -0.240367 |
| H | -1.875660 | -2.230679 | 0.641136  |
| C | -0.563173 | 1.310289  | -0.002623 |
| C | -2.813307 | -0.286040 | 0.183864  |
| H | -3.308612 | 0.144689  | -0.695627 |
| C | -1.810034 | 0.764502  | 0.753651  |
| H | -2.424568 | 1.637517  | 1.022029  |
| H | -1.428599 | 0.372137  | 1.708778  |
| H | -2.916683 | -2.238286 | -0.799440 |
| H | -3.597254 | -0.443475 | 0.940579  |
| O | -0.405646 | 2.675361  | 0.070705  |
| H | -1.110256 | 3.055814  | 0.615697  |
| C | 1.916391  | 1.088014  | -0.563075 |
| H | 2.145729  | 1.462343  | -1.571111 |
| H | 2.059611  | 1.937378  | 0.117232  |
| C | 1.070453  | -1.730813 | 0.423010  |
| H | 1.403620  | -2.599480 | -0.161850 |
| H | 0.510098  | -2.144736 | 1.275832  |
| C | 2.885652  | -0.065901 | -0.201716 |
| H | 3.065099  | -0.690770 | -1.087831 |
| H | 3.858349  | 0.346838  | 0.091448  |



|   |          |           |          |
|---|----------|-----------|----------|
| C | 2.310455 | -0.952659 | 0.917867 |
| H | 3.068518 | -1.657510 | 1.280292 |
| H | 2.037393 | -0.318023 | 1.772733 |

**7c'**, B3LYP/6-31G(d), E = -504.0000276 hartrees

|   |           |           |           |
|---|-----------|-----------|-----------|
| C | 0.216144  | 0.518211  | -0.054948 |
| C | -0.962786 | 1.185826  | 0.065902  |
| C | -2.362081 | 0.721874  | 0.404159  |
| C | 0.374065  | -0.956789 | 0.017546  |
| C | -2.681427 | -0.775104 | 0.452341  |
| C | -0.567785 | -1.858576 | -0.321439 |
| C | -1.992505 | -1.550878 | -0.687683 |
| H | -3.007378 | 1.198881  | -0.346151 |
| H | -2.372682 | -1.208023 | 1.410588  |
| H | -2.641747 | 1.195199  | 1.356735  |
| H | -3.772481 | -0.884588 | 0.396415  |
| H | -0.310826 | -2.912686 | -0.221784 |
| H | -2.528437 | -2.484834 | -0.890419 |
| H | -2.045010 | -0.951284 | -1.610110 |
| O | -1.054708 | 2.550955  | -0.103945 |
| C | 1.481999  | 1.311937  | -0.404203 |
| C | 1.716543  | -1.477557 | 0.514810  |
| C | 2.782917  | 0.752090  | 0.192811  |
| H | 1.595602  | 1.349752  | -1.499860 |
| H | 1.407621  | 2.355565  | -0.067080 |
| C | 2.918471  | -0.743263 | -0.088020 |
| H | 1.782989  | -2.554147 | 0.321904  |
| H | 1.760717  | -1.352378 | 1.608947  |
| H | 3.635167  | 1.311396  | -0.213165 |
| H | 2.784346  | 0.914440  | 1.279870  |
| H | 3.852732  | -1.133726 | 0.335004  |
| H | 2.958962  | -0.918286 | -1.172652 |
| H | -0.203245 | 2.900450  | -0.404341 |

**5d**, B3LYP/6-31G(d), E = -1005.2029163 hartrees

|   |          |           |           |
|---|----------|-----------|-----------|
| C | 4.384521 | -0.594867 | -1.353653 |
| C | 3.407801 | 0.598953  | -1.236737 |
| C | 2.397082 | 0.304485  | -0.170421 |
| C | 2.483649 | -0.674034 | 0.739187  |
| C | 3.602592 | -1.673371 | 0.846688  |
| C | 4.804616 | -1.152977 | 0.022995  |
| H | 3.951989 | 1.522826  | -0.983664 |

|   |           |           |           |
|---|-----------|-----------|-----------|
| H | 2.933833  | 0.794107  | -2.211527 |
| H | 3.894900  | -1.399721 | -1.922546 |
| H | 5.280352  | -0.310841 | -1.926476 |
| H | 3.910079  | -1.830650 | 1.892878  |
| H | 3.296667  | -2.668350 | 0.477490  |
| H | 5.293923  | -0.348317 | 0.590897  |
| H | 5.554988  | -1.946759 | -0.108884 |
| C | -0.640858 | -0.936637 | -0.051715 |
| C | -0.181015 | 0.518955  | -0.437519 |
| C | 1.093048  | 0.952548  | 0.422638  |
| C | 1.222121  | -0.321268 | 1.503349  |
| C | -0.001129 | -1.227326 | 1.350381  |
| H | 0.090314  | 0.541133  | -1.503171 |
| H | -0.727333 | -0.980486 | 2.135943  |
| H | 0.226139  | -2.301132 | 1.462052  |
| H | 1.383535  | 0.024673  | 2.532043  |
| O | 1.188205  | 2.198939  | 0.811357  |
| C | -1.470821 | 1.375265  | -0.363047 |
| C | -2.225761 | -0.870739 | 0.005046  |
| H | -2.498077 | -0.642560 | 1.045190  |
| C | -2.564438 | 0.395869  | -0.797722 |
| H | -2.481414 | 0.222135  | -1.879855 |
| H | -3.556754 | 0.808794  | -0.587675 |
| C | -0.129961 | -1.939976 | -1.104530 |
| H | 0.956035  | -1.848752 | -1.198242 |
| H | -0.353229 | -2.982696 | -0.841692 |
| H | -0.565323 | -1.743530 | -2.094014 |
| C | -3.019227 | -2.138316 | -0.385603 |
| H | -2.659469 | -2.493588 | -1.362056 |
| C | -4.524818 | -1.853924 | -0.534203 |
| H | -4.729601 | -1.138997 | -1.337825 |
| H | -5.077207 | -2.777069 | -0.757912 |
| H | -4.938531 | -1.436939 | 0.394052  |
| C | -2.820820 | -3.270803 | 0.637111  |
| H | -1.764452 | -3.512409 | 0.784900  |
| H | -3.228554 | -2.978999 | 1.614503  |
| H | -3.339089 | -4.186632 | 0.321136  |
| O | -1.799564 | 1.831011  | 0.952362  |
| O | -1.478138 | 2.532092  | -1.179716 |
| C | -1.008813 | 3.609455  | -0.362038 |
| H | 0.082930  | 3.658683  | -0.392860 |
| H | -1.483119 | 4.529880  | -0.727704 |
| C | -1.442225 | 3.208086  | 1.061904  |
| H | -0.601323 | 3.311999  | 1.749905  |
| H | -2.329504 | 3.761593  | 1.410431  |

**6d (TS)**, B3LYP/6-31G(d), E = -1005.1835777 hartrees

|   |           |           |           |
|---|-----------|-----------|-----------|
| C | 4.539483  | -0.377804 | -1.111213 |
| C | 3.704700  | 0.842420  | -0.672287 |
| C | 2.449659  | 0.361695  | 0.023567  |
| C | 2.348104  | -0.809279 | 0.719267  |
| C | 3.278294  | -1.982490 | 0.434335  |
| C | 4.656138  | -1.438542 | 0.001412  |
| H | 4.309836  | 1.480530  | -0.004979 |
| H | 3.462425  | 1.473042  | -1.539547 |
| H | 4.059049  | -0.842813 | -1.985862 |
| H | 5.543865  | -0.065322 | -1.436614 |
| H | 3.391824  | -2.620385 | 1.322319  |
| H | 2.894163  | -2.641806 | -0.365472 |
| H | 5.145931  | -0.980132 | 0.874121  |
| H | 5.310302  | -2.259500 | -0.331170 |
| C | -0.632038 | -0.969286 | -0.055216 |
| C | -0.139140 | 0.499671  | -0.428904 |
| C | 1.199023  | 1.132812  | 0.096545  |
| C | 1.222742  | -0.714928 | 1.616569  |
| C | -0.025390 | -1.469086 | 1.327262  |
| H | -0.007503 | 0.494093  | -1.524596 |
| H | -0.766517 | -1.312987 | 2.123035  |
| H | 0.110890  | -2.567938 | 1.243240  |
| H | 1.253743  | -0.085898 | 2.499860  |
| O | 1.229147  | 2.390814  | 0.183818  |
| C | -1.401065 | 1.394335  | -0.268998 |
| C | -2.214153 | -0.855876 | 0.022357  |
| H | -2.462182 | -0.689438 | 1.080917  |
| C | -2.538825 | 0.461805  | -0.690499 |
| H | -2.513137 | 0.350515  | -1.783244 |
| H | -3.504701 | 0.896360  | -0.412631 |
| C | -0.168461 | -1.913873 | -1.184416 |
| H | 0.917719  | -1.843705 | -1.289426 |
| H | -0.417390 | -2.963627 | -0.983888 |
| H | -0.611474 | -1.642592 | -2.152753 |
| C | -3.058108 | -2.069040 | -0.437380 |
| H | -2.724923 | -2.367200 | -1.441977 |
| C | -4.554209 | -1.719708 | -0.541706 |
| H | -4.744609 | -0.945471 | -1.292111 |
| H | -5.143554 | -2.605049 | -0.816950 |
| H | -4.938820 | -1.352137 | 0.419507  |
| C | -2.893588 | -3.278689 | 0.498892  |
| H | -1.848110 | -3.579762 | 0.607817  |
| H | -3.268705 | -3.038903 | 1.503154  |
| H | -3.462593 | -4.143091 | 0.129491  |

|   |           |          |           |
|---|-----------|----------|-----------|
| O | -1.657967 | 1.825485 | 1.065739  |
| O | -1.421332 | 2.565247 | -1.075614 |
| C | -1.225354 | 3.713735 | -0.262150 |
| H | -0.247903 | 4.157201 | -0.465338 |
| H | -2.025708 | 4.433994 | -0.492283 |
| C | -1.298223 | 3.195574 | 1.189551  |
| H | -0.328071 | 3.294424 | 1.681308  |
| H | -2.080186 | 3.694533 | 1.780610  |

Negative Nuclear Hessian Mode      1 Eigenvalue = -321.04 cm<sup>-1</sup>

**6d'** (TS), B3LYP/6-31G(d), E = -1005.1824398 hartrees

|   |           |           |           |
|---|-----------|-----------|-----------|
| C | 4.362771  | -0.622717 | -1.367883 |
| C | 3.222975  | 0.415607  | -1.392438 |
| C | 2.320670  | 0.228683  | -0.203684 |
| C | 2.501642  | -0.640220 | 0.818115  |
| C | 3.818375  | -1.379308 | 0.991045  |
| C | 4.908655  | -0.819252 | 0.056563  |
| H | 3.651236  | 1.435138  | -1.378930 |
| H | 2.685302  | 0.347356  | -2.355685 |
| H | 3.983006  | -1.588888 | -1.733575 |
| H | 5.170876  | -0.321987 | -2.051729 |
| H | 4.142290  | -1.314692 | 2.042127  |
| H | 3.677612  | -2.456790 | 0.796279  |
| H | 5.250976  | 0.153037  | 0.440386  |
| H | 5.787526  | -1.481569 | 0.042216  |
| C | -0.605987 | -0.928761 | -0.060924 |
| C | -0.234365 | 0.554592  | -0.456062 |
| C | 1.098492  | 1.081449  | 0.093094  |
| C | 1.351474  | -0.715562 | 1.704440  |
| C | 0.042751  | -1.355956 | 1.303784  |
| H | -0.086939 | 0.559765  | -1.550265 |
| H | -0.674019 | -1.129237 | 2.107178  |
| H | 0.069219  | -2.475919 | 1.271979  |
| H | 1.572317  | -0.888921 | 2.766850  |
| O | 1.233184  | 2.270520  | 0.440357  |
| C | -1.526369 | 1.384705  | -0.269076 |
| C | -2.198044 | -0.909060 | 0.044956  |
| H | -2.438024 | -0.760776 | 1.106963  |
| C | -2.617781 | 0.390267  | -0.662284 |
| H | -2.608761 | 0.276994  | -1.755349 |
| H | -3.602411 | 0.764351  | -0.363276 |
| C | -0.108039 | -1.860199 | -1.186447 |
| H | .972408   | -1.730957 | -1.306731 |
| H | -0.291598 | -2.917889 | -0.960921 |

|   |           |           |           |
|---|-----------|-----------|-----------|
| H | -0.584211 | -1.630515 | -2.150494 |
| C | -2.978546 | -2.166942 | -0.408475 |
| H | -2.628467 | -2.454467 | -1.410169 |
| C | -4.491371 | -1.899639 | -0.518758 |
| H | -4.724229 | -1.144181 | -1.276616 |
| H | -5.029175 | -2.818982 | -0.787806 |
| H | -4.899118 | -1.547166 | 0.438549  |
| C | -2.752661 | -3.358914 | 0.537110  |
| H | -1.690576 | -3.585672 | 0.666239  |
| H | -3.160443 | -3.138655 | 1.533199  |
| H | -3.257069 | -4.260568 | 0.163077  |
| O | -1.768239 | 1.810217  | 1.069363  |
| O | -1.607103 | 2.557716  | -1.068829 |
| C | -1.237719 | 3.673929  | -0.264240 |
| H | -0.194155 | 3.946944  | -0.441627 |
| H | -1.900943 | 4.508819  | -0.527870 |
| C | -1.426737 | 3.186062  | 1.189330  |
| H | -0.500834 | 3.299391  | 1.757817  |
| H | -2.255654 | 3.695831  | 1.702060  |

Negative Nuclear Hessian Mode      1 Eigenvalue = -279.17 cm<sup>-1</sup>

**7d**, B3LYP/6-31G(d), E = -1005.202502 hartrees

|   |           |           |           |
|---|-----------|-----------|-----------|
| C | .616442   | -0.701588 | -0.758901 |
| C | 3.844661  | 0.577923  | -0.377055 |
| C | 2.424961  | 0.246192  | 0.027959  |
| C | 2.117419  | -0.944187 | 0.729452  |
| C | 2.926500  | -2.195587 | 0.418225  |
| C | 4.416391  | -1.827349 | 0.272229  |
| H | 4.395216  | 1.079263  | 0.442025  |
| H | 3.831270  | 1.290278  | -1.210390 |
| H | 4.256627  | -1.058508 | -1.736407 |
| H | 5.690927  | -0.488410 | -0.877692 |
| H | 2.795644  | -2.952907 | 1.203901  |
| H | 2.599888  | -2.659796 | -0.528955 |
| H | 4.800126  | -1.493051 | 1.248686  |
| H | 5.004730  | -2.714104 | -0.011338 |
| C | -0.802440 | -0.946847 | -0.183134 |
| C | -0.169412 | 0.501304  | -0.560100 |
| C | 1.343556  | 1.021912  | -0.475932 |
| C | 0.988133  | -0.905051 | 1.528280  |
| C | -0.200990 | -1.696869 | 1.094468  |
| H | -0.295664 | 0.551931  | -1.651936 |
| H | -0.978089 | -1.782229 | 1.868335  |
| H | 0.074613  | -2.723078 | 0.808353  |

|   |           |           |           |
|---|-----------|-----------|-----------|
| H | 0.699192  | 0.104935  | 1.826879  |
| O | 1.514350  | 2.110065  | -1.089792 |
| C | -1.252052 | 1.520525  | -0.096002 |
| C | -2.338859 | -0.632179 | 0.083876  |
| H | -2.455015 | -0.595278 | 1.176567  |
| C | -2.564268 | 0.804818  | -0.396531 |
| H | -2.731232 | 0.856634  | -1.480639 |
| H | -3.397196 | 1.311763  | 0.101059  |
| C | -0.556100 | -1.834826 | -1.422401 |
| H | 0.521899  | -1.881202 | -1.612457 |
| H | -0.914258 | -2.862763 | -1.289072 |
| H | -1.029387 | -1.428563 | -2.326396 |
| C | -3.380250 | -1.656726 | -0.428629 |
| H | -3.187438 | -1.844236 | -1.495214 |
| C | -4.819115 | -1.120027 | -0.315184 |
| H | -4.973869 | -0.223517 | -0.924145 |
| H | -5.544549 | -1.876898 | -0.643336 |
| H | -5.059427 | -0.861182 | 0.725147  |
| C | -3.293966 | -3.000647 | 0.315958  |
| H | -2.294264 | -3.439669 | 0.270119  |
| H | -3.541835 | -2.867592 | 1.377657  |
| H | -4.004558 | -3.726824 | -0.101962 |
| O | -1.193311 | 1.834196  | 1.298690  |
| O | -1.250116 | 2.779040  | -0.754592 |
| C | -0.582228 | 3.729193  | 0.066293  |
| H | 0.371277  | 4.007798  | -0.387173 |
| H | -1.234696 | 4.608836  | 0.171430  |
| C | -0.372961 | 2.993467  | 1.409446  |
| H | 0.677783  | 2.716237  | 1.549137  |
| H | -0.717644 | 3.565012  | 2.279475  |

**7d'**, B3LYP/6-31G(d), E = -1005.2554561 hartrees

|   |           |           |           |
|---|-----------|-----------|-----------|
| C | -4.870625 | 0.169077  | 0.265350  |
| C | -3.611709 | 0.896832  | -0.223524 |
| C | -2.310928 | 0.120531  | -0.023778 |
| C | -2.355058 | -1.321312 | -0.147695 |
| C | -3.668950 | -2.020362 | 0.205980  |
| C | -4.913523 | -1.263622 | -0.270601 |
| H | -3.762858 | 1.139729  | -1.294180 |
| H | -3.513217 | 1.866991  | 0.273730  |
| H | -4.873850 | 0.131429  | 1.366303  |
| H | -5.773562 | 0.724028  | -0.034259 |
| H | -3.663726 | -3.042292 | -0.197475 |
| H | -3.741550 | -2.117378 | 1.302957  |

|   |           |           |           |
|---|-----------|-----------|-----------|
| H | -4.932332 | -1.240792 | -1.371207 |
| H | -5.827283 | -1.786003 | 0.053886  |
| C | 0.807823  | -0.964069 | 0.274607  |
| C | 0.236736  | 0.473011  | 0.614131  |
| C | -1.177936 | 0.950625  | 0.153861  |
| C | -1.330261 | -2.120445 | -0.552072 |
| C | 0.018894  | -1.588715 | -0.911900 |
| H | 0.192952  | 0.546642  | 1.711181  |
| H | -0.080130 | -0.787711 | -1.665179 |
| H | 0.621722  | -2.383187 | -1.370412 |
| H | -1.466576 | -3.202536 | -0.544206 |
| O | -1.286871 | 2.218137  | 0.131143  |
| C | 1.384502  | 1.466934  | 0.241236  |
| C | 2.314024  | -0.722358 | -0.156014 |
| H | 2.310175  | -0.589380 | -1.249059 |
| C | 2.654842  | 0.642619  | 0.447088  |
| H | 2.849697  | 0.562322  | 1.525733  |
| H | 3.506527  | 1.147464  | -0.018648 |
| C | 0.700446  | -1.842460 | 1.536428  |
| H | -0.340867 | -1.877099 | 1.868053  |
| H | 1.020200  | -2.877818 | 1.363545  |
| H | 1.305579  | -1.434326 | 2.357580  |
| C | 3.359584  | -1.822661 | 0.159761  |
| H | 3.314196  | -2.041749 | 1.236394  |
| C | 4.791459  | -1.338701 | -0.142429 |
| H | 5.078825  | -0.485003 | 0.479214  |
| H | 5.519153  | -2.141928 | 0.035850  |
| H | 4.887778  | -1.031744 | -1.192912 |
| C | 3.118588  | -3.140004 | -0.598506 |
| H | 2.150784  | -3.588514 | -0.361612 |
| H | 3.149313  | -2.974933 | -1.683810 |
| H | 3.897797  | -3.874909 | -0.353462 |
| O | 1.357312  | 1.896094  | -1.119477 |
| O | 1.463316  | 2.643932  | 1.030543  |
| C | 1.014091  | 3.760822  | 0.275438  |
| H | 0.031340  | 4.083145  | 0.624608  |
| H | 1.750640  | 4.568963  | 0.401679  |
| C | 0.935608  | 3.253677  | -1.179994 |
| H | -0.088857 | 3.315360  | -1.553335 |
| H | 1.622422  | 3.789423  | -1.852826 |

**8d (TS)**, B3LYP/6-31G(d), E = -1005.1988025 hartrees

|   |          |           |           |
|---|----------|-----------|-----------|
| C | 4.456976 | -0.817198 | -1.012767 |
| C | 3.658821 | 0.497535  | -0.903622 |

|   |           |           |           |
|---|-----------|-----------|-----------|
| C | 2.322751  | 0.261123  | -0.232408 |
| C | 2.172398  | -0.703070 | 0.796942  |
| C | 3.022495  | -1.965268 | 0.747700  |
| C | 4.456807  | -1.606903 | 0.309048  |
| H | 4.272463  | 1.226096  | -0.339641 |
| H | 3.501299  | 0.943025  | -1.893156 |
| H | 4.004700  | -1.447544 | -1.794172 |
| H | 5.492949  | -0.617953 | -1.330531 |
| H | 3.036580  | -2.459891 | 1.728765  |
| H | 2.625415  | -2.702720 | 0.028363  |
| H | 4.929945  | -0.995125 | 1.092729  |
| H | 5.066169  | -2.518734 | 0.208781  |
| C | -0.750499 | -0.996382 | 0.223247  |
| C | -0.334085 | 0.386332  | -0.436102 |
| C | 1.147823  | 0.886204  | -0.752718 |
| C | 1.150409  | -0.446794 | 1.701495  |
| C | -0.121885 | -1.239330 | 1.666812  |
| H | -0.735399 | 0.318063  | -1.460616 |
| H | -0.824169 | -0.895832 | 2.440150  |
| H | 0.001724  | -2.324756 | 1.808374  |
| H | 0.909597  | 0.611512  | 1.774708  |
| O | 1.185600  | 1.796759  | -1.625856 |
| C | -1.296112 | 1.429969  | 0.196321  |
| C | -2.334552 | -0.874446 | 0.374292  |
| H | -2.602898 | -1.327505 | 1.339502  |
| C | -2.596575 | 0.656532  | 0.466008  |
| H | -3.309932 | 0.999456  | -0.285086 |
| H | -2.989603 | 0.956795  | 1.442276  |
| C | -0.249097 | -2.107856 | -0.718795 |
| H | 0.806063  | -1.935174 | -0.938809 |
| H | -0.336345 | -3.107731 | -0.277168 |
| H | -0.782170 | -2.105805 | -1.677429 |
| C | -3.247041 | -1.597981 | -0.665412 |
| H | -2.867295 | -1.398789 | -1.678409 |
| C | -4.711878 | -1.113220 | -0.618908 |
| H | -4.834133 | -0.076299 | -0.942715 |
| H | -5.338981 | -1.734297 | -1.272306 |
| H | -5.117057 | -1.193891 | 0.399318  |
| C | -3.276987 | -3.122522 | -0.442498 |
| H | -2.287868 | -3.579306 | -0.474390 |
| H | -3.715827 | -3.349853 | 0.539282  |
| H | -3.899334 | -3.615309 | -1.201594 |
| O | -0.844422 | 2.042412  | 1.404505  |
| O | -1.595499 | 2.534475  | -0.662361 |
| C | -0.741529 | 3.620667  | -0.324603 |
| H | 0.027013  | 3.747055  | -1.090351 |



|   |           |          |           |
|---|-----------|----------|-----------|
| H | -1.359792 | 4.526230 | -0.240994 |
| C | -0.117054 | 3.207696 | 1.029520  |
| H | 0.950132  | 2.984576 | 0.922593  |
| H | -0.255782 | 3.954006 | 1.820911  |

Negative Nuclear Hessian Mode      1 Eigenvalue = -61.15 cm<sup>-1</sup>

**5e**, B3LYP/6-31G(d), LANL2DZ, E = -1033.3973828 hartrees

|   |           |           |           |
|---|-----------|-----------|-----------|
| C | -3.517329 | -2.572405 | 1.476398  |
| C | -3.021750 | -1.105575 | 1.520201  |
| C | -2.132060 | -0.866212 | 0.335754  |
| C | -2.011814 | -1.666594 | -0.731230 |
| C | -2.745252 | -2.958692 | -0.948970 |
| C | -3.921925 | -3.023367 | 0.055775  |
| H | -3.880723 | -0.411147 | 1.508463  |
| H | -2.496435 | -0.911943 | 2.470367  |
| H | -2.709203 | -3.228491 | 1.837487  |
| H | -4.364335 | -2.709807 | 2.164615  |
| H | -3.123069 | -3.046300 | -1.980975 |
| H | -2.072424 | -3.822854 | -0.803131 |
| H | -4.731290 | -2.369464 | -0.306284 |
| H | -4.333358 | -4.042549 | 0.092912  |
| C | 1.090311  | -1.098438 | -0.044019 |
| C | 0.260764  | 0.100282  | 0.555088  |
| C | -1.133205 | 0.210794  | -0.178010 |
| C | -0.967768 | -0.822314 | -1.445278 |
| C | 0.476587  | -1.344636 | -1.463716 |
| H | 0.083699  | -0.077885 | 1.660655  |
| H | 1.052824  | -0.781588 | -2.211770 |
| H | 0.547850  | -2.406096 | -1.749628 |
| H | -1.284400 | -0.394835 | -2.418673 |
| O | -1.643943 | 1.447319  | -0.351931 |
| C | 1.232193  | 1.293424  | 0.543379  |
| C | 2.588171  | -0.573078 | -0.110014 |
| H | 2.736327  | -0.161959 | -1.119181 |
| C | 2.589477  | 0.638057  | 0.839170  |
| H | 2.617982  | 0.325613  | 1.894154  |
| H | 3.420935  | 1.333856  | 0.669310  |
| C | 0.945986  | -2.346679 | 0.848382  |
| H | -0.110575 | -2.600177 | 0.972412  |
| H | 1.449016  | -3.222586 | 0.422897  |
| H | 1.364187  | -2.172935 | 1.848253  |
| C | 3.730539  | -1.591249 | 0.107197  |
| H | 3.539441  | -2.148325 | 1.035638  |
| C | 5.094124  | -0.894254 | 0.267794  |

|   |           |           |           |
|---|-----------|-----------|-----------|
| H | 5.131894  | -0.261665 | 1.161074  |
| H | 5.898664  | -1.636014 | 0.351140  |
| H | 5.317439  | -0.260566 | -0.601578 |
| C | 3.816163  | -2.599693 | -1.052746 |
| H | 2.872134  | -3.128697 | -1.216694 |
| H | 4.072725  | -2.085646 | -1.989191 |
| H | 4.594030  | -3.350511 | -0.863565 |
| O | 1.289165  | 1.962383  | -0.721902 |
| O | 0.912296  | 2.309970  | 1.511361  |
| C | 0.885699  | 3.583590  | 0.859288  |
| H | -0.159260 | 3.887550  | 0.669052  |
| H | 1.374669  | 4.331875  | 1.501036  |
| C | 1.630979  | 3.321395  | -0.447035 |
| H | 1.293057  | 3.942583  | -1.288824 |
| H | 2.722288  | 3.439101  | -0.318463 |
| K | -2.874925 | 3.584629  | -0.674537 |

**6e (TS)**, B3LYP/6-31G(d), LANL2DZ, E = -1033.367 hartrees

|   |           |           |           |
|---|-----------|-----------|-----------|
| C | 4.443893  | -0.961863 | -0.937124 |
| C | 3.679031  | 0.281443  | -0.432153 |
| C | 2.401325  | -0.169034 | 0.243532  |
| C | 2.220570  | -1.380516 | 0.837084  |
| C | 3.103961  | -2.577807 | 0.534729  |
| C | 4.507164  | -2.081001 | 0.121595  |
| H | 4.322332  | 0.853676  | 0.260785  |
| H | 3.471904  | 0.961890  | -1.276670 |
| H | 3.935783  | -1.353247 | -1.833539 |
| H | 5.461981  | -0.683748 | -1.248219 |
| H | 3.184102  | -3.243777 | 1.407018  |
| H | 2.682973  | -3.193668 | -0.280675 |
| H | 5.026381  | -1.695595 | 1.014040  |
| H | 5.111874  | -2.918378 | -0.257469 |
| C | -0.734040 | -1.243251 | -0.080989 |
| C | -0.164272 | 0.229689  | -0.205395 |
| C | 1.183976  | 0.633780  | 0.481324  |
| C | 1.047429  | -1.259915 | 1.687063  |
| C | -0.245045 | -1.889608 | 1.285272  |
| H | -0.013934 | 0.412615  | -1.297178 |
| H | -1.012522 | -1.730401 | 2.055260  |
| H | -0.176582 | -2.982466 | 1.131829  |
| H | 1.066035  | -0.564645 | 2.531384  |
| O | 1.304802  | 1.877478  | 0.807300  |
| C | -1.377832 | 1.127080  | 0.118278  |
| C | -2.317265 | -1.078638 | -0.095499 |

|   |           |           |           |
|---|-----------|-----------|-----------|
| H | -2.645233 | -1.133422 | 0.952624  |
| C | -2.547117 | 0.378004  | -0.529283 |
| H | -2.481397 | 0.491355  | -1.621885 |
| H | -3.512845 | 0.786069  | -0.205626 |
| C | -0.209823 | -2.070576 | -1.271391 |
| H | 0.882732  | -2.047238 | -1.284641 |
| H | -0.519353 | -3.119947 | -1.218112 |
| H | -0.561466 | -1.666070 | -2.229432 |
| C | -3.159898 | -2.128859 | -0.858753 |
| H | -2.745942 | -2.249333 | -1.870362 |
| C | -4.624366 | -1.678780 | -1.017908 |
| H | -4.714467 | -0.768863 | -1.620855 |
| H | -5.216395 | -2.462296 | -1.507689 |
| H | -5.083927 | -1.480107 | -0.039979 |
| C | -3.135831 | -3.499654 | -0.158884 |
| H | -2.120198 | -3.878430 | -0.009519 |
| H | -3.610304 | -3.432779 | 0.829751  |
| H | -3.690592 | -4.245633 | -0.742148 |
| O | -1.577509 | 1.258257  | 1.523063  |
| O | -1.299303 | 2.476316  | -0.397962 |
| C | -1.563226 | 3.394977  | 0.675239  |
| H | -0.614403 | 3.814878  | 1.048210  |
| H | -2.214259 | 4.201219  | 0.306244  |
| C | -2.223538 | 2.514932  | 1.732093  |
| H | -2.029457 | 2.837004  | 2.764745  |
| H | -3.313041 | 2.433290  | 1.568495  |
| K | 1.157669  | 3.364169  | -1.345189 |

Negative Nuclear Hessian Mode      1 Eigenvalue = -394.97 cm<sup>-1</sup>

**6e' (TS)**, B3LYP/6-31G(d), LANL2DZ, E = -1033.3772659 hartrees

|   |          |           |           |
|---|----------|-----------|-----------|
| C | 4.373567 | -0.990636 | -1.499353 |
| C | 3.244031 | 0.034874  | -1.719614 |
| C | 2.332441 | 0.078271  | -0.518016 |
| C | 2.535618 | -0.532079 | 0.666743  |
| C | 3.841827 | -1.238856 | 0.971644  |
| C | 4.931464 | -0.911726 | -0.068646 |
| H | 3.677671 | 1.035996  | -1.901928 |
| H | 2.687501 | -0.211529 | -2.640311 |
| H | 3.980091 | -2.005360 | -1.671713 |
| H | 5.176005 | -0.832287 | -2.234735 |
| H | 4.183656 | -0.964986 | 1.983980  |
| H | 3.669969 | -2.329860 | 1.007205  |
| H | 5.310996 | 0.107259  | 0.110905  |
| H | 5.787545 | -1.592528 | 0.046411  |

|   |           |           |           |
|---|-----------|-----------|-----------|
| C | -0.527894 | -1.227781 | -0.149808 |
| C | -0.238553 | 0.173236  | -0.834730 |
| C | 1.055056  | 0.887209  | -0.477002 |
| C | 1.361325  | -0.464372 | 1.571571  |
| C | 0.227706  | -1.434287 | 1.222154  |
| H | -0.111366 | -0.013512 | -1.964871 |
| H | -0.511910 | -1.382602 | 2.034861  |
| H | 0.562827  | -2.494978 | 1.219693  |
| H | 1.634731  | -0.612485 | 2.638988  |
| O | 1.116209  | 2.138272  | -0.417911 |
| C | -1.549014 | 0.977977  | -0.772063 |
| C | -2.105747 | -1.206409 | 0.069448  |
| H | -2.271515 | -0.829912 | 1.090186  |
| C | -2.622885 | -0.107024 | -0.872699 |
| H | -2.673042 | -0.458589 | -1.914438 |
| H | -3.610722 | 0.282895  | -0.597673 |
| C | -0.100122 | -2.342463 | -1.128800 |
| H | 0.972184  | -2.252782 | -1.338286 |
| H | -0.271304 | -3.342465 | -0.717505 |
| H | -0.633049 | -2.272755 | -2.086439 |
| C | -2.870523 | -2.548408 | -0.030649 |
| H | -2.622360 | -3.019976 | -0.992561 |
| C | -4.395814 | -2.335440 | -0.011922 |
| H | -4.744017 | -1.755028 | -0.872693 |
| H | -4.917420 | -3.300650 | -0.029527 |
| H | -4.709314 | -1.807008 | 0.899057  |
| C | -2.490570 | -3.525970 | 1.095613  |
| H | -1.417639 | -3.737130 | 1.123908  |
| H | -2.771126 | -3.113274 | 2.074287  |
| H | -3.019667 | -4.479862 | 0.974774  |
| O | -1.686477 | 1.710444  | 0.457681  |
| O | -1.679015 | 1.944920  | -1.821502 |
| C | -1.942146 | 3.231408  | -1.248342 |
| H | -1.012654 | 3.822017  | -1.202242 |
| H | -2.686170 | 3.753919  | -1.867430 |
| C | -2.449819 | 2.884418  | 0.146251  |
| H | -2.235057 | 3.649328  | 0.907224  |
| H | -3.530641 | 2.658422  | 0.144251  |
| K | 0.444231  | 2.354684  | 2.187358  |

Negative Nuclear Hessian Mode      1 Eigenvalue = -200.87 cm<sup>-1</sup>

7e, B3LYP/6-31G(d), LANL2DZ, E = -1033.3856305 hartrees

|   |          |           |           |
|---|----------|-----------|-----------|
| C | 4.718930 | -0.682442 | -0.504161 |
| C | 3.893056 | 0.398019  | 0.228827  |

|   |           |           |           |
|---|-----------|-----------|-----------|
| C | 2.456596  | -0.053148 | 0.410436  |
| C | 2.167364  | -1.424800 | 0.715126  |
| C | 3.011813  | -2.490394 | 0.031923  |
| C | 4.499297  | -2.084855 | 0.091580  |
| H | 4.373558  | 0.596700  | 1.205104  |
| H | 3.927200  | 1.344776  | -0.326433 |
| H | 4.419981  | -0.702402 | -1.565232 |
| H | 5.789619  | -0.426180 | -0.481433 |
| H | 2.862026  | -3.474139 | 0.500201  |
| H | 2.730766  | -2.596075 | -1.031387 |
| H | 4.834254  | -2.090245 | 1.141861  |
| H | 5.115282  | -2.824573 | -0.441906 |
| C | -0.720781 | -1.295803 | -0.304565 |
| C | -0.113830 | 0.217931  | -0.248508 |
| C | 1.372481  | 0.734232  | -0.012652 |
| C | 1.002588  | -1.646769 | 1.399740  |
| C | -0.109466 | -2.367693 | 0.713589  |
| H | -0.267565 | 0.570484  | -1.292016 |
| H | -0.897528 | -2.728256 | 1.389414  |
| H | 0.254796  | -3.235712 | 0.145868  |
| H | 0.642551  | -0.814401 | 2.006241  |
| O | 1.519763  | 1.953297  | -0.406752 |
| C | -1.209515 | 1.030879  | 0.493632  |
| C | -2.263442 | -1.091857 | 0.029649  |
| H | -2.382758 | -1.371754 | 1.086451  |
| C | -2.513197 | 0.419877  | -0.019344 |
| H | -2.683555 | 0.775651  | -1.046965 |
| H | -3.366367 | 0.738357  | 0.592556  |
| C | -0.456111 | -1.797621 | -1.740786 |
| H | 0.623439  | -1.794718 | -1.932561 |
| H | -0.813415 | -2.820494 | -1.898830 |
| H | -0.927524 | -1.156531 | -2.496657 |
| C | -3.286831 | -1.942542 | -0.762431 |
| H | -3.083768 | -1.820402 | -1.836672 |
| C | -4.732185 | -1.469824 | -0.516331 |
| H | -4.896179 | -0.442646 | -0.858743 |
| H | -5.442626 | -2.115043 | -1.048412 |
| H | -4.983776 | -1.511728 | 0.552291  |
| C | -3.190984 | -3.440436 | -0.420729 |
| H | -2.190787 | -3.849448 | -0.590131 |
| H | -3.442223 | -3.610132 | 0.634941  |
| H | -3.897912 | -4.021432 | -1.026524 |
| O | -1.079163 | 0.898216  | 1.910884  |
| O | -1.228182 | 2.451477  | 0.238338  |
| C | -0.970794 | 3.141546  | 1.470189  |
| H | 0.109434  | 3.337126  | 1.575740  |

|   |           |          |           |
|---|-----------|----------|-----------|
| H | -1.529425 | 4.088772 | 1.464698  |
| C | -1.462124 | 2.141586 | 2.505616  |
| H | -0.967580 | 2.223323 | 3.483727  |
| H | -2.557879 | 2.198385 | 2.635272  |
| K | 0.125864  | 3.543868 | -1.886580 |

7e', B3LYP/6-31G(d), LANL2DZ, E = -1033.4359093 hartrees

|   |           |           |           |
|---|-----------|-----------|-----------|
| C | -4.867921 | -0.328597 | -0.059392 |
| C | -3.620692 | 0.370109  | -0.618533 |
| C | -2.285002 | -0.292587 | -0.258358 |
| C | -2.279589 | -1.756519 | -0.184535 |
| C | -3.579389 | -2.442623 | 0.241521  |
| C | -4.839167 | -1.824807 | -0.375249 |
| H | -3.734504 | 0.419787  | -1.719645 |
| H | -3.598070 | 1.413052  | -0.284979 |
| H | -4.908085 | -0.198288 | 1.035125  |
| H | -5.774874 | 0.142507  | -0.468722 |
| H | -3.519881 | -3.515015 | 0.008694  |
| H | -3.677651 | -2.365895 | 1.339572  |
| H | -4.831399 | -1.971207 | -1.467879 |
| H | -5.737366 | -2.330777 | 0.010088  |
| C | 0.840305  | -1.223029 | 0.313523  |
| C | 0.241109  | 0.239551  | 0.357738  |
| C | -1.203210 | 0.591034  | -0.113644 |
| C | -1.218595 | -2.560004 | -0.438785 |
| C | 0.143668  | -2.058118 | -0.798280 |
| H | 0.261709  | 0.553630  | 1.427821  |
| H | 0.091291  | -1.409928 | -1.691542 |
| H | 0.787755  | -2.905669 | -1.065367 |
| H | -1.336932 | -3.636703 | -0.302507 |
| O | -1.369479 | 1.872183  | -0.226346 |
| C | 1.344686  | 1.127380  | -0.281938 |
| C | 2.370789  | -1.039621 | -0.079658 |
| H | 2.433420  | -1.202537 | -1.166868 |
| C | 2.646038  | 0.450222  | 0.146288  |
| H | 2.823236  | 0.668305  | 1.210731  |
| H | 3.499231  | 0.837664  | -0.423450 |
| C | 0.656379  | -1.867421 | 1.701245  |
| H | -0.399262 | -1.840492 | 1.987775  |
| H | 0.973759  | -2.915530 | 1.724914  |
| H | 1.225144  | -1.324385 | 2.466777  |
| C | 3.416137  | -1.985494 | 0.564678  |
| H | 3.284281  | -1.960431 | 1.656196  |
| C | 4.853920  | -1.514332 | 0.271315  |

|   |           |           |           |
|---|-----------|-----------|-----------|
| H | 5.063318  | -0.529446 | 0.701416  |
| H | 5.581534  | -2.221232 | 0.689450  |
| H | 5.035786  | -1.453618 | -0.810510 |
| C | 3.273584  | -3.445619 | 0.098109  |
| H | 2.293812  | -3.871794 | 0.331489  |
| H | 3.417603  | -3.520121 | -0.988330 |
| H | 4.033067  | -4.077472 | 0.576003  |
| O | 1.216280  | 1.148439  | -1.701313 |
| O | 1.372260  | 2.510622  | 0.134682  |
| C | 1.293385  | 3.343812  | -1.032425 |
| H | 0.255950  | 3.682605  | -1.180818 |
| H | 1.962458  | 4.206411  | -0.898584 |
| C | 1.728015  | 2.404780  | -2.152034 |
| H | 1.275793  | 2.632415  | -3.127507 |
| H | 2.827784  | 2.371980  | -2.251976 |
| K | -0.676216 | 3.418080  | 1.748260  |

**8e (TS)**, B3LYP/6-31G(d), LANL2DZ, E = -1033.3837072 hartrees

|   |           |           |           |
|---|-----------|-----------|-----------|
| C | 4.750402  | -0.690281 | -0.504733 |
| C | 3.899506  | 0.433484  | 0.127039  |
| C | 2.472648  | -0.028477 | 0.352502  |
| C | 2.208234  | -1.376000 | 0.762979  |
| C | 3.080058  | -2.479635 | 0.183701  |
| C | 4.558079  | -2.038873 | 0.211982  |
| H | 4.375993  | 0.732827  | 1.079546  |
| H | 3.913484  | 1.325620  | -0.513297 |
| H | 4.458046  | -0.810232 | -1.560909 |
| H | 5.815186  | -0.409802 | -0.501320 |
| H | 2.947477  | -3.418803 | 0.740172  |
| H | 2.807344  | -2.689095 | -0.866076 |
| H | 4.888610  | -1.944958 | 1.259535  |
| H | 5.191968  | -2.809244 | -0.252692 |
| C | -0.657930 | -1.362131 | -0.286763 |
| C | -0.103649 | 0.169332  | -0.305537 |
| C | 1.371896  | 0.723784  | -0.097934 |
| C | 1.044846  | -1.558456 | 1.465366  |
| C | -0.066225 | -2.333797 | 0.837885  |
| H | -0.259150 | 0.463428  | -1.366268 |
| H | -0.862143 | -2.618364 | 1.540246  |
| H | 0.291445  | -3.257563 | 0.361061  |
| H | 0.679155  | -0.664098 | 1.971703  |
| O | 1.502609  | 1.918197  | -0.561176 |
| C | -1.233327 | 0.972176  | 0.384518  |
| C | -2.223380 | -1.189555 | -0.047972 |

|   |           |           |           |
|---|-----------|-----------|-----------|
| H | -2.397729 | -1.435421 | 1.009178  |
| C | -2.505738 | 0.313675  | -0.166333 |
| H | -2.630047 | 0.626340  | -1.214010 |
| H | -3.400541 | 0.620883  | 0.388290  |
| C | -0.294384 | -1.949311 | -1.667160 |
| H | 0.792854  | -1.917852 | -1.800680 |
| H | -0.608135 | -2.992564 | -1.775683 |
| H | -0.742789 | -1.376558 | -2.488828 |
| C | -3.178004 | -2.096222 | -0.863083 |
| H | -2.911829 | -2.017627 | -1.927403 |
| C | -4.645684 | -1.649046 | -0.727314 |
| H | -4.810921 | -0.642643 | -1.126353 |
| H | -5.307286 | -2.335168 | -1.271039 |
| H | -4.962004 | -1.649474 | 0.324799  |
| C | -3.070865 | -3.574057 | -0.445348 |
| H | -2.051185 | -3.962594 | -0.522138 |
| H | -3.393968 | -3.701929 | 0.596717  |
| H | -3.717252 | -4.202094 | -1.071514 |
| O | -1.172855 | 0.866778  | 1.812223  |
| O | -1.216663 | 2.379305  | 0.130367  |
| C | -1.982363 | 2.978322  | 1.183990  |
| H | -1.629743 | 4.011014  | 1.319158  |
| H | -3.055152 | 2.990603  | 0.928088  |
| C | -1.693932 | 2.070604  | 2.392493  |
| H | -0.927078 | 2.492839  | 3.060723  |
| H | -2.602846 | 1.857596  | 2.977448  |
| K | 0.359074  | 4.021446  | -1.425865 |

Negative Nuclear Hessian Mode      1 Eigenvalue = -53.76 cm<sup>-1</sup>

**5f**, B3LYP/6-31G(d), LANL2DZ, E = -961.5806195 hartrees

|   |           |           |           |
|---|-----------|-----------|-----------|
| C | -3.489309 | -2.445158 | 1.646687  |
| C | -2.959316 | -0.989895 | 1.647966  |
| C | -2.103006 | -0.790339 | 0.431060  |
| C | -2.035854 | -1.613357 | -0.623675 |
| C | -2.806378 | -2.891308 | -0.794187 |
| C | -3.951154 | -2.910168 | 0.248299  |
| H | -3.803173 | -0.276941 | 1.653612  |
| H | -2.398399 | -0.792185 | 2.576770  |
| H | -2.684649 | -3.113860 | 1.992037  |
| H | -4.315798 | -2.551355 | 2.364774  |
| H | -3.219485 | -2.988295 | -1.811869 |
| H | -2.149950 | -3.768846 | -0.653814 |
| H | -4.755919 | -2.242625 | -0.099223 |
| H | -4.385667 | -3.918084 | 0.316672  |



|   |           |           |           |
|---|-----------|-----------|-----------|
| C | 1.115056  | -1.115814 | -0.079019 |
| C | 0.331618  | 0.091970  | 0.569800  |
| C | -1.079035 | 0.241860  | -0.128202 |
| C | -0.995629 | -0.807035 | -1.386295 |
| C | 0.431936  | -1.365312 | -1.464459 |
| H | 0.161719  | -0.148312 | 1.634824  |
| H | 0.986172  | -0.829409 | -2.248757 |
| H | 0.461082  | -2.431904 | -1.739328 |
| H | -1.343683 | -0.379308 | -2.349320 |
| O | -1.543740 | 1.498667  | -0.318885 |
| C | 1.311359  | 1.300042  | 0.588462  |
| C | 2.604874  | -0.603039 | -0.206891 |
| H | 2.708364  | -0.165589 | -1.212152 |
| C | 2.660716  | 0.570308  | 0.788744  |
| H | 2.730568  | 0.187148  | 1.819251  |
| H | 3.524094  | 1.227971  | 0.627641  |
| C | 1.000311  | -2.362571 | 0.821293  |
| H | -0.052683 | -2.602903 | 0.996756  |
| H | 1.471108  | -3.246699 | 0.375022  |
| H | 1.467601  | -2.193544 | 1.800173  |
| C | 3.747653  | -1.637914 | -0.082879 |
| H | 3.605864  | -2.212870 | 0.843666  |
| C | 5.127402  | -0.960801 | 0.010155  |
| H | 5.226214  | -0.347692 | 0.912175  |
| H | 5.926439  | -1.713104 | 0.029654  |
| H | 5.306679  | -0.310908 | -0.857608 |
| C | 3.752169  | -2.624103 | -1.264726 |
| H | 2.795853  | -3.144447 | -1.376397 |
| H | 3.950546  | -2.093823 | -2.206416 |
| H | 4.535861  | -3.382714 | -1.141413 |
| C | 1.628557  | 3.638550  | 1.251316  |
| H | 1.258907  | 4.512988  | 1.802249  |
| H | 2.720676  | 3.612694  | 1.373670  |
| C | 1.259080  | 3.663767  | -0.241965 |
| H | 0.215450  | 3.991526  | -0.343902 |
| H | 1.878842  | 4.351704  | -0.830784 |
| K | -3.226657 | 3.222647  | -1.054224 |
| C | 1.378085  | 2.189801  | -0.706676 |
| H | 0.571034  | 1.941273  | -1.396464 |
| H | 2.332530  | 2.034138  | -1.226405 |
| C | 1.008978  | 2.315064  | 1.719311  |
| H | 1.380953  | 1.974883  | 2.694914  |
| H | -0.079424 | 2.434173  | 1.796625  |

6f (TS), B3LYP/6-31G(d), LANL2DZ, E = -961.550989 hartrees

|   |           |           |           |
|---|-----------|-----------|-----------|
| C | -3.868153 | -1.604280 | 1.678826  |
| C | -3.272633 | -0.192790 | 1.484813  |
| C | -2.145190 | -0.271447 | 0.474265  |
| C | -2.039426 | -1.209212 | -0.504793 |
| C | -2.807752 | -2.517502 | -0.468566 |
| C | -4.109903 | -2.328650 | 0.339776  |
| H | -4.078155 | 0.494437  | 1.158343  |
| H | -2.918680 | 0.206150  | 2.448780  |
| H | -3.170831 | -2.203089 | 2.283561  |
| H | -4.806265 | -1.546748 | 2.247909  |
| H | -3.043049 | -2.870172 | -1.484020 |
| H | -2.202751 | -3.315025 | -0.001252 |
| H | -4.821547 | -1.736703 | -0.260184 |
| H | -4.589395 | -3.301411 | 0.523414  |
| C | 1.030162  | -1.081037 | -0.035137 |
| C | 0.442155  | 0.231328  | 0.632619  |
| C | -1.014567 | 0.678695  | 0.292623  |
| C | -1.026843 | -0.734763 | -1.443661 |
| C | 0.344564  | -1.329969 | -1.445218 |
| H | 0.422914  | 0.023732  | 1.720764  |
| H | 0.961013  | -0.875990 | -2.233870 |
| H | 0.353094  | -2.418957 | -1.635341 |
| H | -1.198492 | 0.189341  | -2.006364 |
| O | -1.268045 | 1.943868  | 0.299773  |
| C | 1.540230  | 1.328258  | 0.485134  |
| C | 2.581332  | -0.788016 | -0.191305 |
| H | 2.742656  | -0.489629 | -1.238088 |
| C | 2.811281  | 0.470477  | 0.663881  |
| H | 2.920319  | 0.195490  | 1.724664  |
| H | 3.720389  | 1.017283  | 0.381227  |
| C | 0.750499  | -2.278777 | 0.897615  |
| H | -0.323005 | -2.370006 | 1.082181  |
| H | 1.095513  | -3.227675 | 0.472126  |
| H | 1.240626  | -2.152492 | 1.871549  |
| C | 3.581231  | -1.943899 | 0.062371  |
| H | 3.346364  | -2.411860 | 1.029112  |
| C | 5.033327  | -1.437508 | 0.146645  |
| H | 5.185210  | -0.756591 | 0.990630  |
| H | 5.727545  | -2.278861 | 0.268511  |
| H | 5.319403  | -0.903883 | -0.770286 |
| C | 3.496673  | -3.025125 | -1.030375 |
| H | 2.487282  | -3.433615 | -1.140284 |
| H | 3.790123  | -2.608739 | -2.003887 |
| H | 4.174892  | -3.859580 | -0.809977 |
| C | 1.492879  | 3.814203  | 0.775929  |

|   |           |          |           |
|---|-----------|----------|-----------|
| H | 0.464767  | 4.144969 | 0.586764  |
| H | 2.007067  | 4.615238 | 1.321649  |
| C | 2.163096  | 3.462961 | -0.562014 |
| H | 1.973613  | 4.203162 | -1.350258 |
| H | 3.253423  | 3.399407 | -0.432915 |
| K | -3.353950 | 1.968927 | -1.374553 |
| C | 1.582930  | 2.075694 | -0.884554 |
| H | 0.566521  | 2.191083 | -1.270086 |
| H | 2.170865  | 1.541501 | -1.639773 |
| C | 1.467137  | 2.476861 | 1.547278  |
| H | 2.331750  | 2.413709 | 2.222865  |
| H | 0.568052  | 2.391964 | 2.163966  |

Negative Nuclear Hessian Mode      1 Eigenvalue = -466.27 cm<sup>-1</sup>

**6f° (TS)**, B3LYP/6-31G(d), LANL2DZ, E = -961.5565304 hartrees

|   |           |           |           |
|---|-----------|-----------|-----------|
| C | 3.872408  | -1.544937 | -1.802227 |
| C | 2.881083  | -0.370844 | -1.932357 |
| C | 2.126969  | -0.172860 | -0.639926 |
| C | 2.359519  | -0.808197 | 0.525887  |
| C | 3.572686  | -1.698248 | 0.713570  |
| C | 4.583925  | -1.535899 | -0.438751 |
| H | 3.426310  | 0.553157  | -2.200788 |
| H | 2.191514  | -0.554614 | -2.774081 |
| H | 3.322891  | -2.494289 | -1.906876 |
| H | 4.607174  | -1.512155 | -2.620000 |
| H | 4.053727  | -1.477801 | 1.681859  |
| H | 3.247660  | -2.752040 | 0.782907  |
| H | 5.120679  | -0.580225 | -0.320702 |
| H | 5.342243  | -2.331388 | -0.397634 |
| C | -0.792928 | -1.143435 | -0.021362 |
| C | -0.438675 | 0.221431  | -0.745589 |
| C | 0.952693  | 0.778912  | -0.486867 |
| C | 1.288300  | -0.559677 | 1.522566  |
| C | -0.010773 | -1.348518 | 1.328904  |
| H | -0.400809 | -0.024206 | -1.827703 |
| H | -0.678119 | -1.080693 | 2.162298  |
| H | 0.132162  | -2.447139 | 1.431574  |
| H | 1.629487  | -0.687402 | 2.574315  |
| O | 1.168050  | 2.019997  | -0.468225 |
| C | -1.658488 | 1.173076  | -0.604761 |
| C | -2.357687 | -1.019725 | 0.232867  |
| H | -2.479597 | -0.672826 | 1.269755  |
| C | -2.806766 | 0.143501  | -0.669478 |
| H | -2.930979 | -0.201401 | -1.708176 |

|   |           |           |           |
|---|-----------|-----------|-----------|
| H | -3.766136 | 0.576812  | -0.358874 |
| C | -0.457517 | -2.299111 | -0.991181 |
| H | 0.608861  | -2.279107 | -1.239385 |
| H | -0.673611 | -3.280893 | -0.555824 |
| H | -1.018821 | -2.217074 | -1.931283 |
| C | -3.219915 | -2.300980 | 0.117070  |
| H | -3.008625 | -2.782134 | -0.848725 |
| C | -4.726875 | -1.982523 | 0.141907  |
| H | -5.035836 | -1.371330 | -0.712546 |
| H | -5.315048 | -2.908801 | 0.117767  |
| H | -5.001125 | -1.441386 | 1.058065  |
| C | -2.908729 | -3.311018 | 1.235934  |
| H | -1.849805 | -3.583909 | 1.270468  |
| H | -3.171832 | -2.890128 | 2.216178  |
| H | -3.491581 | -4.231691 | 1.104335  |
| C | -1.845112 | 3.628306  | -1.042103 |
| H | -0.833333 | 4.031943  | -0.911768 |
| H | -2.427806 | 4.363064  | -1.611144 |
| C | -2.442801 | 3.308899  | 0.336404  |
| H | -2.292082 | 4.108812  | 1.072732  |
| H | -3.527075 | 3.147887  | 0.248106  |
| K | 2.351200  | 2.234992  | 1.907700  |
| C | -1.737969 | 1.996754  | 0.720445  |
| H | -0.728491 | 2.221644  | 1.077052  |
| H | -2.258606 | 1.457034  | 1.519576  |
| C | -1.767579 | 2.252360  | -1.735409 |
| H | -2.679858 | 2.076423  | -2.321760 |
| H | -0.925345 | 2.197431  | -2.433479 |

Negative Nuclear Hessian Mode      1 Eigenvalue = -221.36 cm<sup>-1</sup>

**Table S1.** Summary of computed Gibbs free energies,  $\Delta G$ , for the model alkoxide, potassium alkoxide, and alcohol systems.

|       | Gas Phase      |                     |        |                | THF            |                     |                |
|-------|----------------|---------------------|--------|----------------|----------------|---------------------|----------------|
|       | a              |                     |        | c              | a              |                     | b              |
|       | B3LYP/6-31G(d) | B3LYP/6-311++G(d,p) | M06-2X | B3LYP/6-31G(d) | B3LYP/6-31G(d) | B3LYP/6-311++G(d,p) | B3LYP/6-31G(d) |
| 1 + 2 | 0.0            | 0.0                 | 0.0    | -              | 0.0            | -                   | 0.0            |
| 3     | -29.8          | -22.2               | -32.4  | -              | -19.8          | -                   | -25.5          |
| 4     | -27.1          | -19.7               | -26.6  | -              | -16.4          | -                   | -21.5          |
| 5     | -33.4          | -26.9               | -38.0  | 0.0            | -26.8          | 0.0                 | -32.9          |
| 6     | -30.6          | -22.1               | -31.8  | 28.9           | -22.0          | 14.3                | -18.2          |
| 6'    | -29.7          | -21.5               | -29.1  | 47.8           | -21.2          | 16.0                | -17.5          |
| 7     | -43.9          | -35.2               | -37.0  | 22.3           | -33.9          | 2.7                 | -25.6          |
| 7'    | -71.3          | -61.0               | -71.3  | -14.1          | -61.0          | -23.0               | -57.5          |
| 8     | -29.4          | -23.3               | -33.1  | -              | -              | -                   | -11.5          |

**Table S2.** Summary of computed Gibbs free energies,  $\Delta G$ , for the more complex alkoxide and potassium alkoxide guanacastepene precursors.

|    | Gas Phase      |        | THF            |                |
|----|----------------|--------|----------------|----------------|
|    | d              |        | e              | f              |
|    | B3LYP/6-31G(d) | M06-2X | B3LYP/6-31G(d) | B3LYP/6-31G(d) |
| 5  | 0.0            | 0.0    | 0.0            | 0.0            |
| 6  | 10.9           | 13.4   | 18.8           | 17.5           |
| 6' | 11.0           | 15.1   | 10.7           | 13.8           |
| 7  | 0.8            | 1.8    | 9.1            | -              |
| 7' | -32.1          | -30.5  | -22.2          | -              |
| 8  | 3.7            | 5.0    | 10.5           | -              |

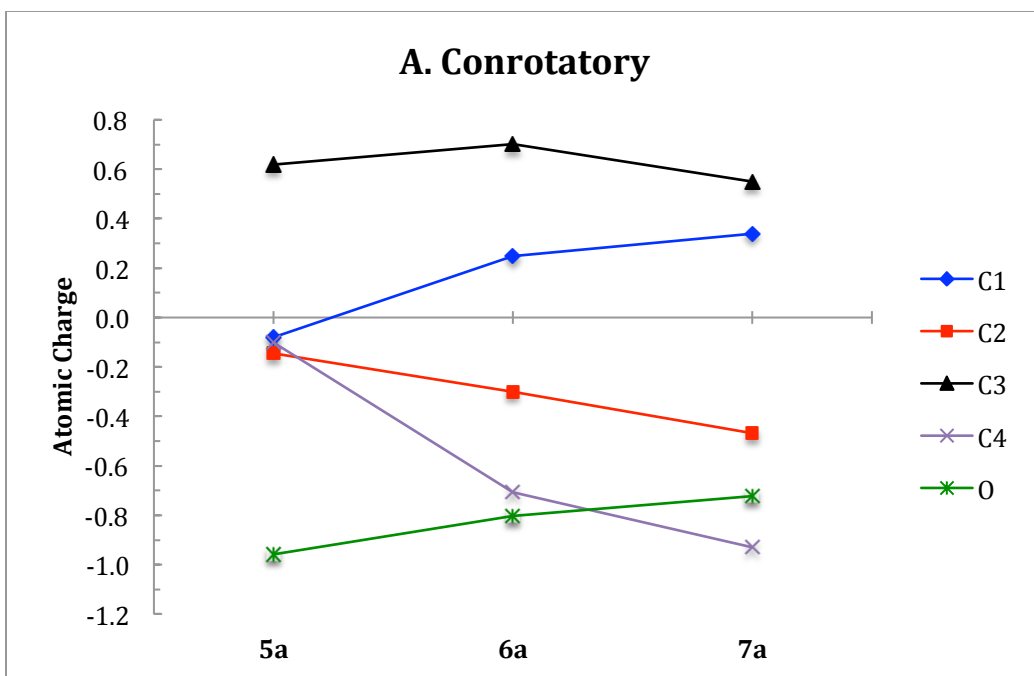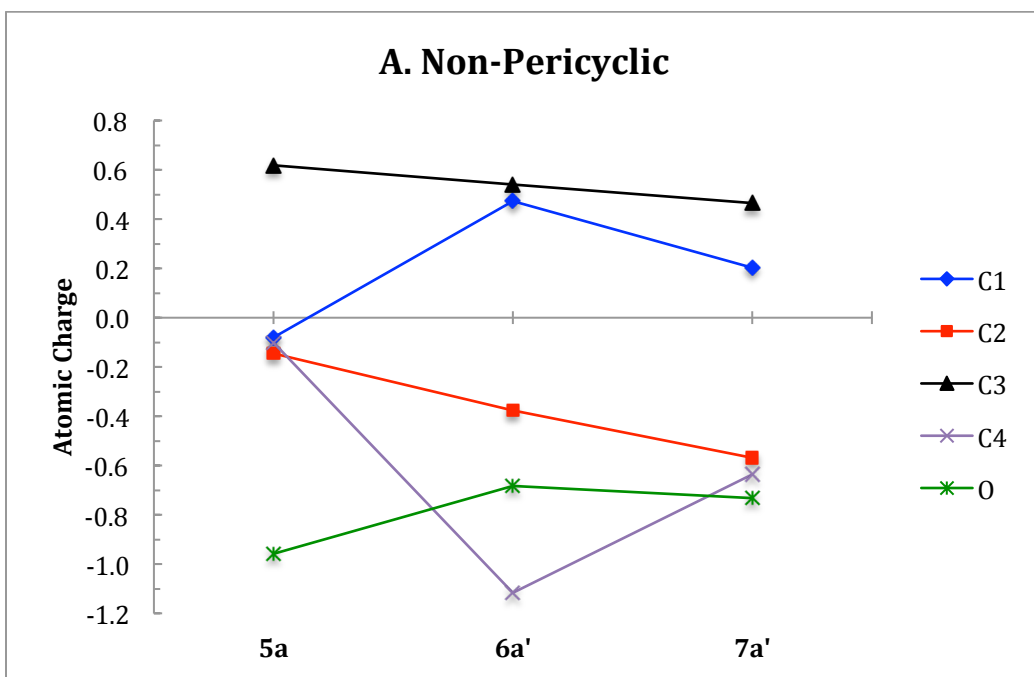

**Figure S1.** Atomic charges on the four carbons and the oxygen substituent in the cyclobutene ring of **5a** throughout the two ring opening pathways.

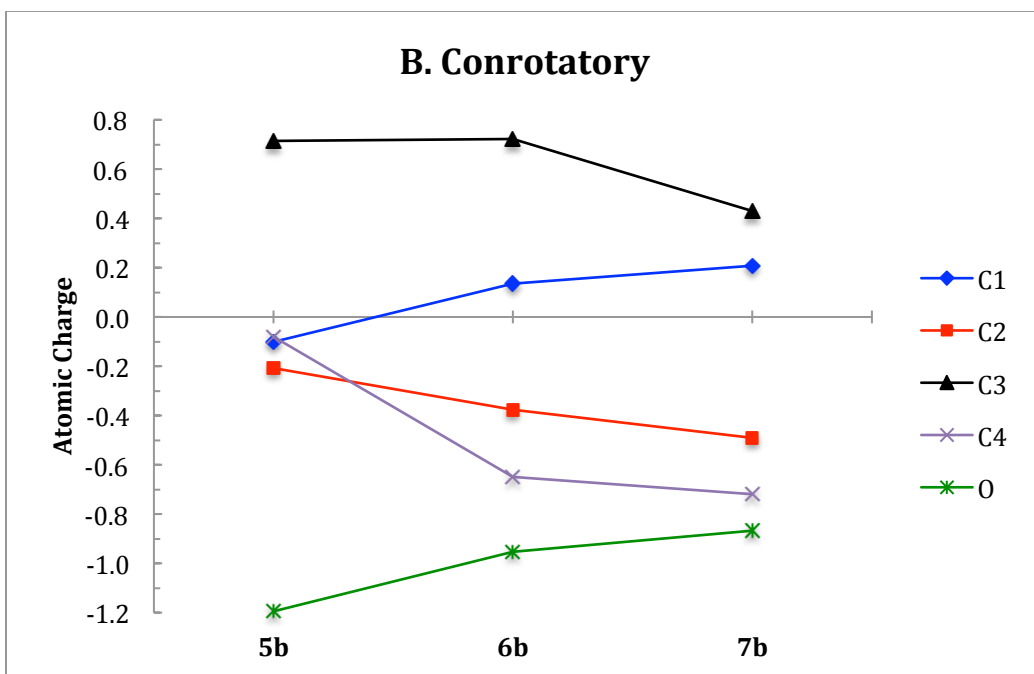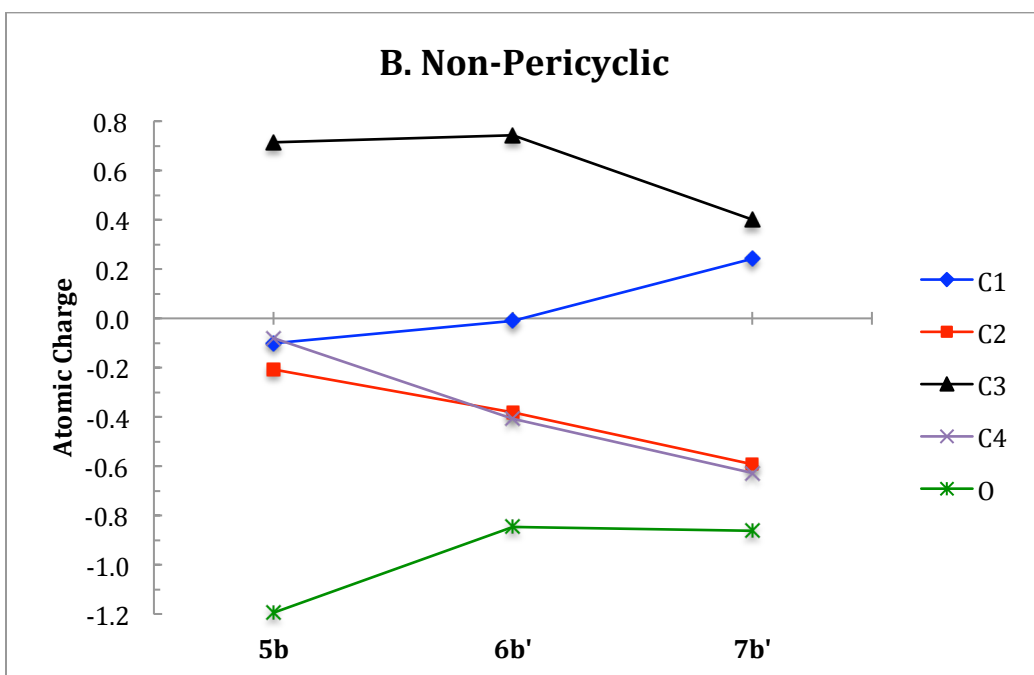

**Figure S2.** Atomic charges on the four carbons and the oxygen substituent in the cyclobutene ring of **5b** throughout the two ring opening pathways.

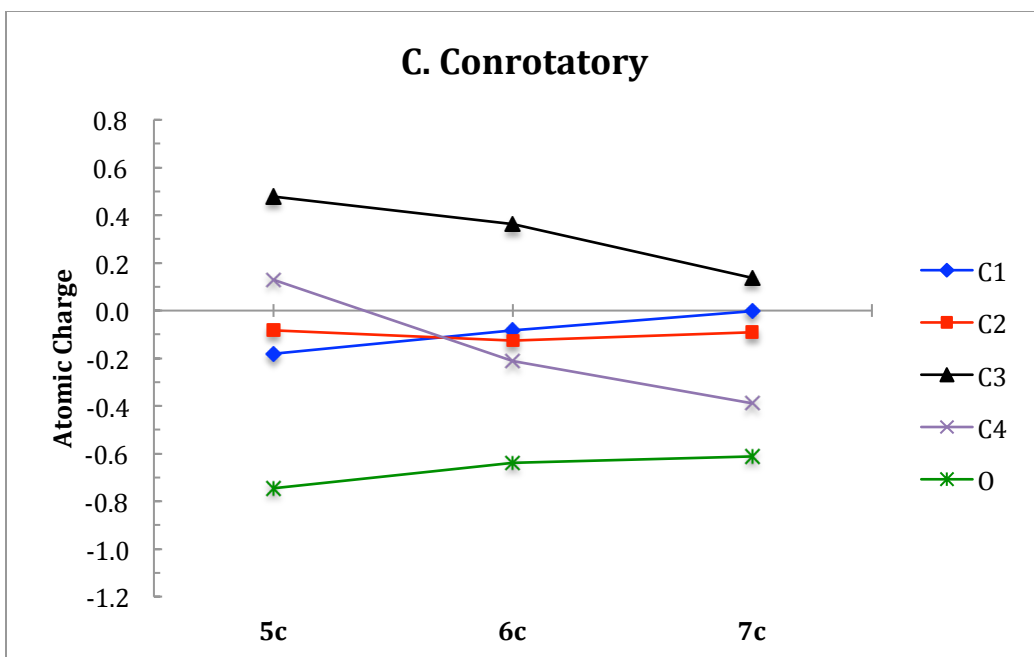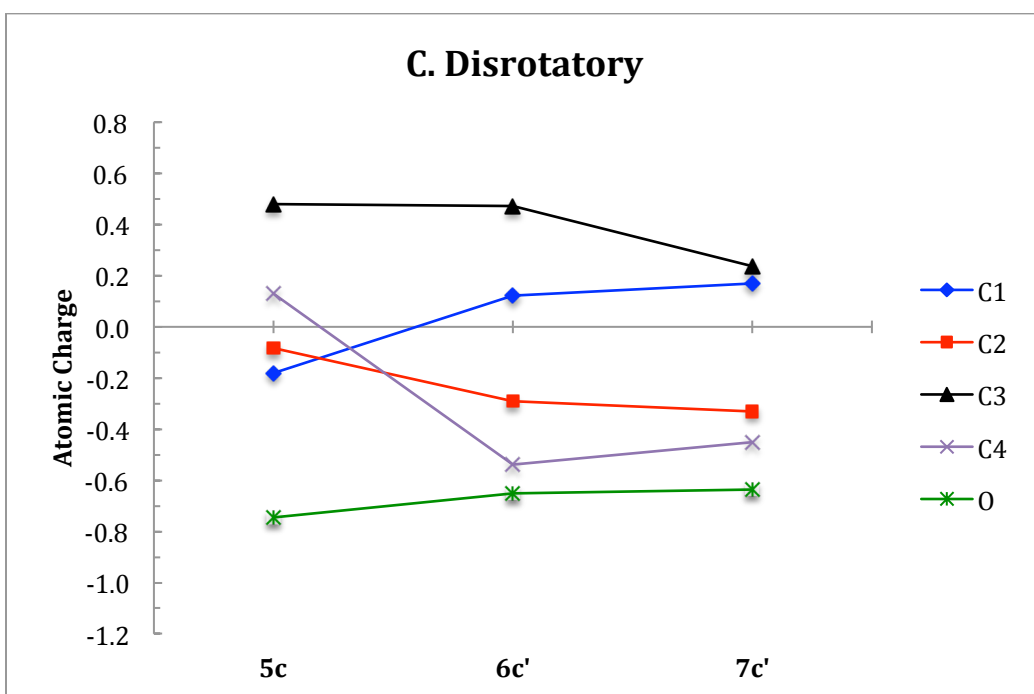

**Figure S3.** Atomic charges on the four carbons and the oxygen substituent in the cyclobutene ring of **5c** throughout the two ring opening pathways.



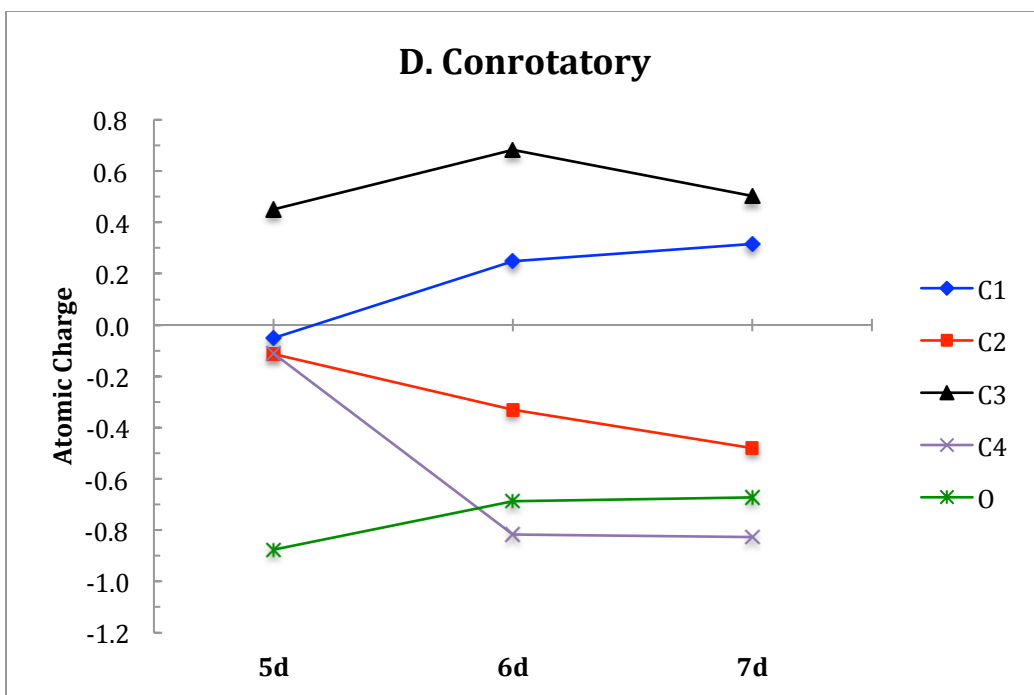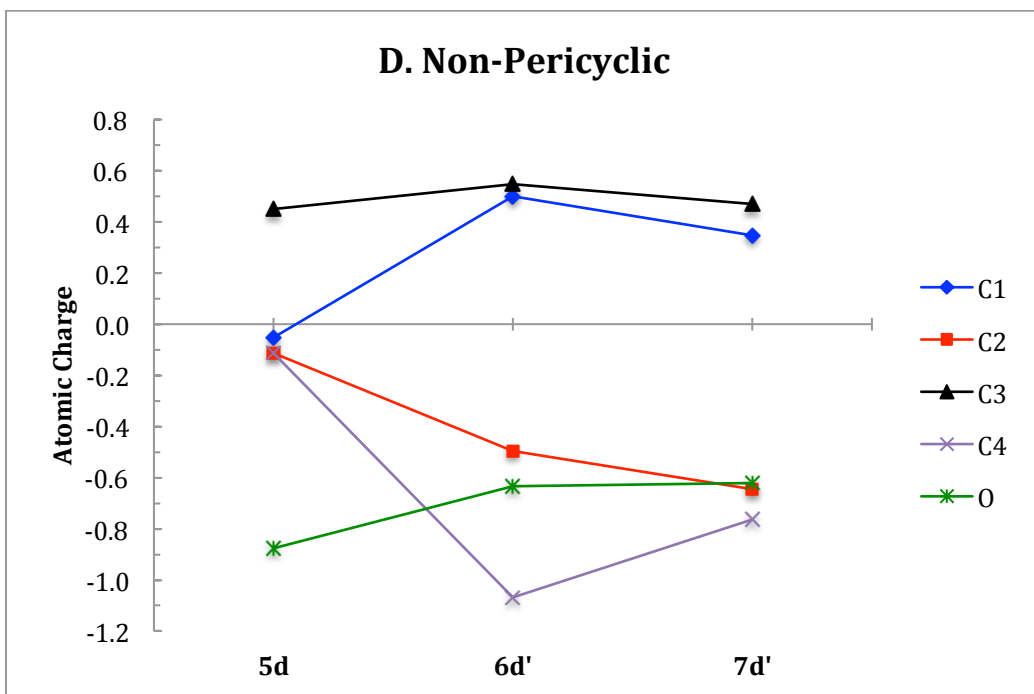

**Figure S4.** Atomic charges on the four carbons and the oxygen substituent in the cyclobutene ring of **5d** throughout the two ring opening pathways.

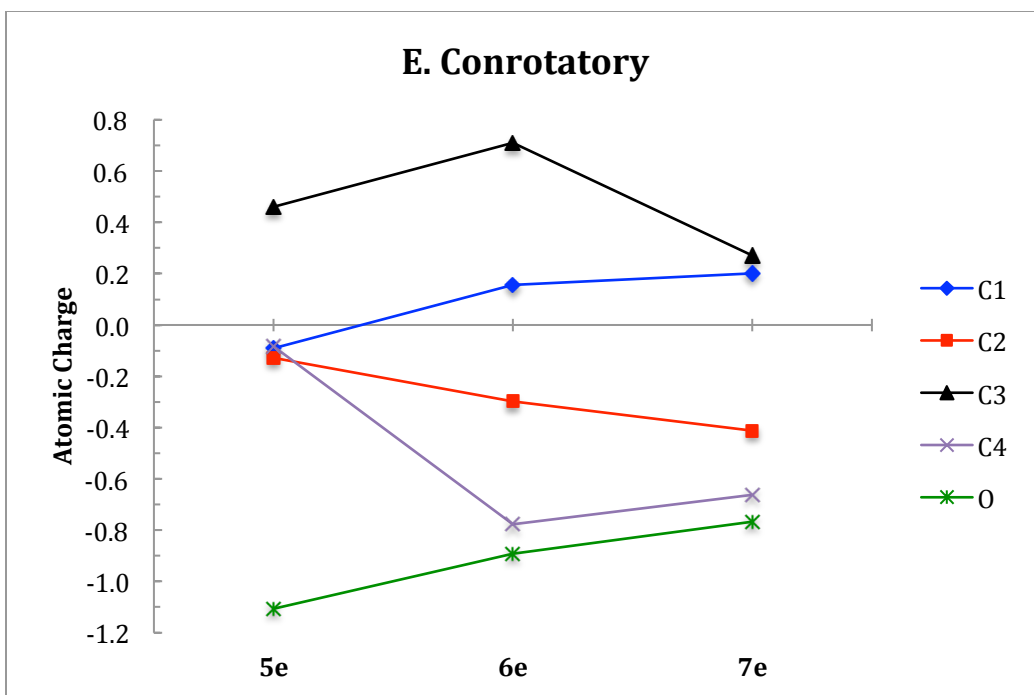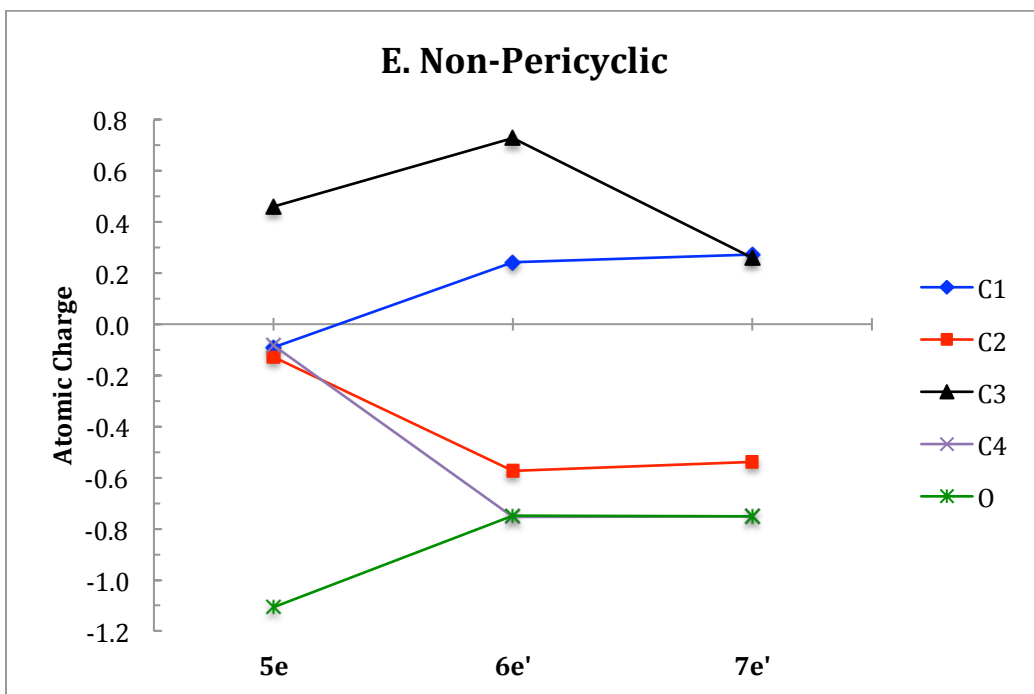

**Figure S5.** Atomic charges on the four carbons and the oxygen substituent in the cyclobutene ring of **5e** throughout the two ring opening pathways.

**Table S3.** Atomic charges on the four carbons and the oxygen substituent in the cyclobutene ring of **5a-e** throughout the two ring opening pathways.

|           | <b>5a</b> | <b>6a</b> | <b>6a'</b> | <b>7a</b> | <b>7a'</b> |
|-----------|-----------|-----------|------------|-----------|------------|
| <b>C1</b> | -0.080    | 0.248     | 0.474      | 0.339     | 0.202      |
| <b>C2</b> | -0.146    | -0.301    | -0.375     | -0.468    | -0.569     |
| <b>C3</b> | 0.618     | 0.702     | 0.541      | 0.55      | 0.464      |
| <b>C4</b> | -0.101    | -0.707    | -1.116     | -0.93     | -0.636     |
| <b>O</b>  | -0.959    | -0.804    | -0.683     | -0.722    | -0.732     |

  

|           | <b>5b</b> | <b>6b</b> | <b>6b'</b> | <b>7b</b> | <b>7b'</b> |
|-----------|-----------|-----------|------------|-----------|------------|
| <b>C1</b> | -0.102    | 0.136     | -0.009     | 0.209     | 0.241      |
| <b>C2</b> | -0.208    | -0.375    | -0.381     | -0.491    | -0.593     |
| <b>C3</b> | 0.715     | 0.722     | 0.744      | 0.430     | 0.401      |
| <b>C4</b> | -0.081    | -0.649    | -0.407     | -0.719    | -0.627     |
| <b>O</b>  | -1.195    | -0.952    | -0.845     | -0.866    | -0.861     |

  

|           | <b>5c</b> | <b>6c</b> | <b>6c'</b> | <b>7c</b> | <b>7c'</b> |
|-----------|-----------|-----------|------------|-----------|------------|
| <b>C1</b> | -0.181    | -0.083    | 0.121      | -0.002    | 0.169      |
| <b>C2</b> | -0.084    | -0.127    | -0.291     | -0.090    | -0.332     |
| <b>C3</b> | 0.479     | 0.362     | 0.473      | 0.137     | 0.237      |
| <b>C4</b> | 0.130     | -0.211    | -0.539     | -0.389    | -0.452     |
| <b>O</b>  | -0.745    | -0.638    | -0.652     | -0.612    | -0.637     |

  

|           | <b>5d</b> | <b>6d</b> | <b>6d'</b> | <b>7d</b> | <b>7d'</b> |
|-----------|-----------|-----------|------------|-----------|------------|
| <b>C1</b> | -0.052    | 0.249     | 0.501      | 0.317     | 0.346      |
| <b>C2</b> | -0.113    | -0.331    | -0.495     | -0.480    | -0.645     |
| <b>C3</b> | 0.450     | 0.682     | 0.548      | 0.504     | 0.470      |
| <b>C4</b> | -0.112    | -0.817    | -1.068     | -0.827    | -0.763     |
| <b>O</b>  | -0.876    | -0.688    | -0.634     | -0.671    | -0.621     |

  

|           | <b>5e</b> | <b>6e</b> | <b>6e'</b> | <b>7e</b> | <b>7e'</b> |
|-----------|-----------|-----------|------------|-----------|------------|
| <b>C1</b> | -0.091    | 0.157     | 0.242      | 0.200     | 0.272      |
| <b>C2</b> | -0.128    | -0.299    | -0.574     | -0.412    | -0.538     |
| <b>C3</b> | 0.460     | 0.711     | 0.727      | 0.270     | 0.259      |
| <b>C4</b> | -0.083    | -0.778    | -0.754     | -0.661    | -0.751     |
| <b>O</b>  | -1.107    | -0.893    | -0.749     | -0.767    | -0.752     |
